# Supplementary material for: Revealing the electrophilicity of N-Ac indoles with FeCl3: a mechanistic study
Source: Royal Society of Chemistry journal article supplement (doi:10.1039/c7cc02756g), 2017-01-01

## Revealing the Electrophilicity of N-Ac Indoles with FeCl<sub>3</sub>: a mechanistic study

Rodolphe Beaud,<sup>†a</sup> Raj Kumar Nandi,<sup>†a</sup> Alejandro Perez-Luna,<sup>b</sup> Régis Guillot,<sup>a</sup> Didier Gori,<sup>a</sup> Cyrille Kouklovsky,<sup>a</sup> Nour-Eddine Ghermani,<sup>\*c,d</sup> Vincent Gandon<sup>\*a,e</sup> and Guillaume Vincent<sup>\*a</sup>

<sup>a</sup> Institut de Chimie Moléculaire et des Matériaux d'Orsay (ICMMO), Univ. Paris-Sud, Université Paris-Saclay, CNRS UMR 8182, 91405 Orsay cedex.

<sup>b</sup> Sorbonne Universités, UPMC Univ Paris 06, CNRS UMR 8232, Institut Parisien de Chimie Moléculaire (IPCM), Case 229, 4 place Jussieu, 75005 Paris, France.

<sup>c</sup> Laboratoire Structures, Propriétés et Modélisation des Solides, Université Paris Saclay, Centrale Supélec, CNRS, UMR 8580, Grande voie des vignes, 92295 Châtenay-Malabry, France.

<sup>d</sup> Laboratoire de Physique Pharmaceutique, Institut Galien Paris Sud, UMR CNRS 8612, Univ. Paris Sud, Faculté de Pharmacie, Université Paris-Saclay, 5 rue Jean-Baptiste Clément, 92296 Châtenay-Malabry, France.

<sup>(e)</sup> Institut de Chimie des Substances Naturelles, CNRS UPR 2301, Univ. Paris-Sud, Université Paris-Saclay, 1, av. de la Terrasse, 91198 Gif-sur-Yvette, France.

\* guillaume.vincent@u-psud.fr; vincent.gandon@u-psud.fr; noureddine.ghermani@u-psud.fr

## Supporting Information

## Table of Contents

|      |                                                                                               |    |
|------|-----------------------------------------------------------------------------------------------|----|
| I.   | Additional data and discussion.....                                                           | 3  |
| I.1  | Influence of the stoichiometry of the promotor on the isolated yield .....                    | 3  |
| I.2  | Influence of the stoichiometry of the promotor on the initial rate of the hydroarylation..... | 4  |
| I.3  | Influence of the C3-substituent on the hydroarylation.....                                    | 5  |
| I.4  | Hydroarylation with d8-toluene.....                                                           | 5  |
| I.5  | X-ray crystallography and electron density topology.....                                      | 6  |
| I.6  | DFT study.....                                                                                | 15 |
| II.  | Experimental details.....                                                                     | 18 |
| II.1 | General Informations .....                                                                    | 18 |
| II.2 | Preparation of N-Ac indoles .....                                                             | 19 |
| II.3 | Promotor loading and kinetic studies .....                                                    | 23 |
| II.4 | <i>In-situ</i> IR monitoring.....                                                             | 25 |
| II.5 | Hammett study at the C <sub>5</sub> - and C <sub>6</sub> -positions.....                      | 27 |
| II.6 | Influence of the C3-substituent.....                                                          | 29 |
| II.7 | Taft study at C <sub>3</sub> position .....                                                   | 32 |
| II.8 | Deuterated experiments .....                                                                  | 34 |
| III. | DFT Coordinates (x,y,z) of the M06-2X computed intermediates.....                             | 37 |
| IV.  | NMR spectra of new compounds .....                                                            | 41 |

## I. Additional data and discussion

### I.1 Influence of the stoichiometry of the promotor on the isolated yield

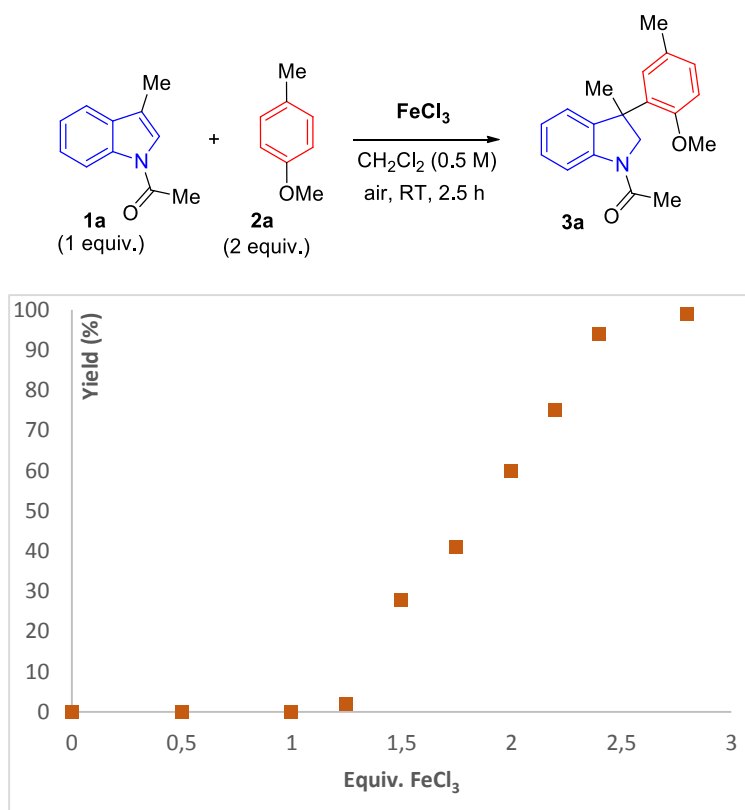

## I.2 Influence of the stoichiometry of the promotor on the initial rate of the hydroarylation.

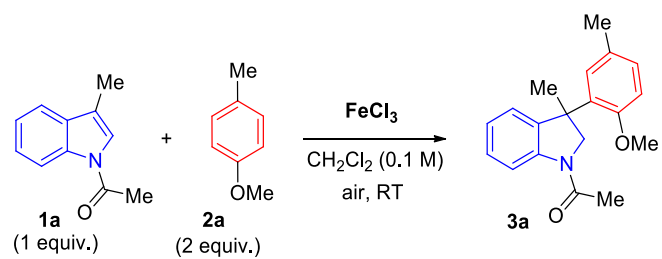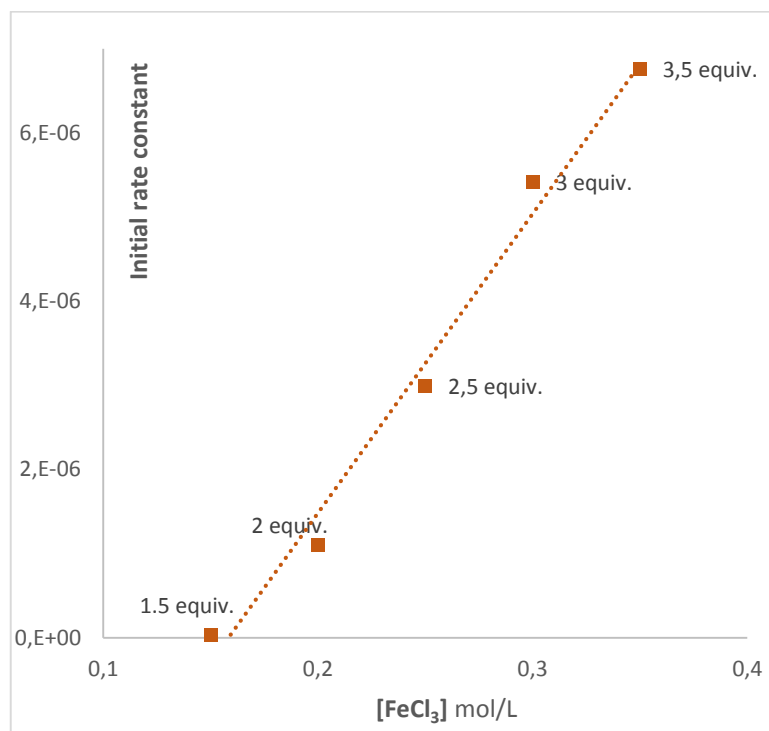

### I.3 Influence of the C3-substituent on the hydroarylation.

#### *Influence of the nature of the 3-substituent on the reactivity and regioselectivity*

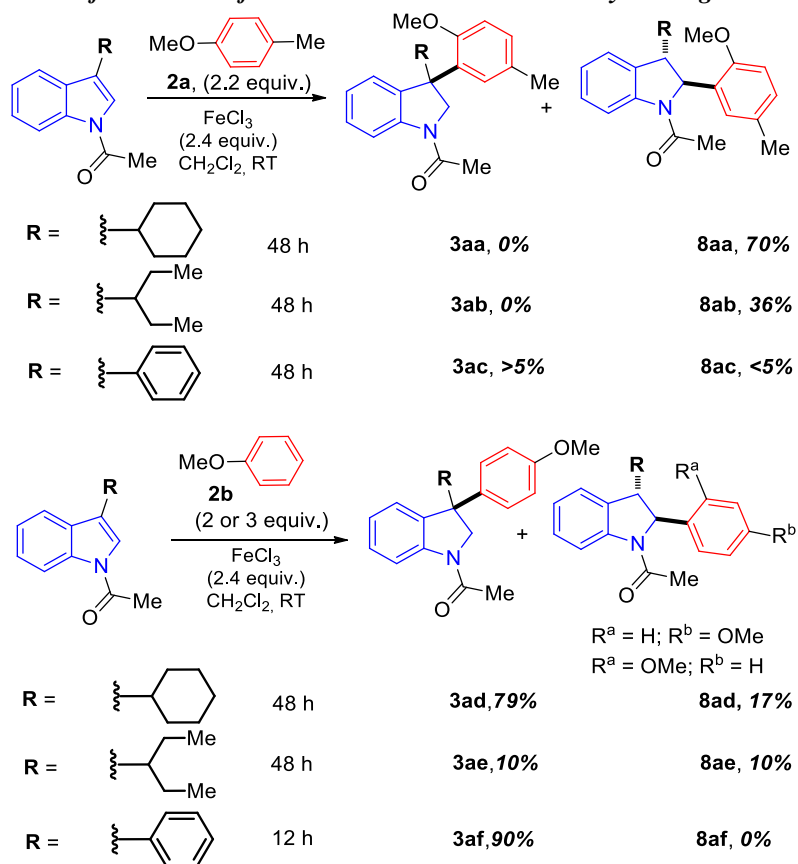

### I.4 Hydroarylation with d8-toluene

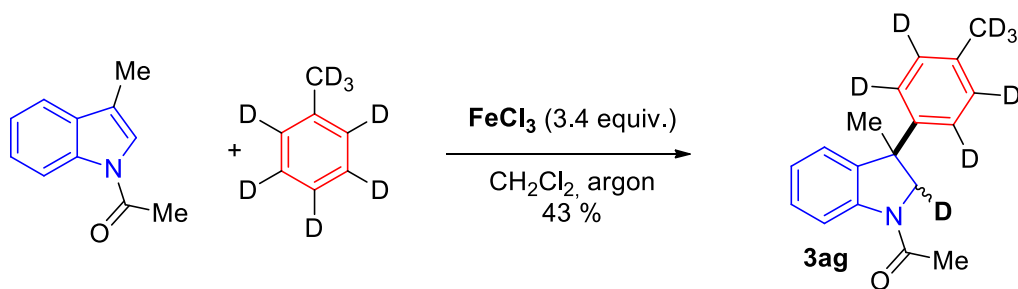

## I.5 X-ray crystallography and electron density topology

***X-ray Data Collection.*** The crystallographic data of N-Ac skatole and its iron complex were collected at 100.0(1) K on a Kappa CCD APEX II diffractometer using graphite monochromated MoK $\alpha$  X-radiation ( $\lambda = 0.71073$  Å). The data spots were recorded as  $\omega$ -scans ( $\Delta\omega = 1.0^\circ$ ) in order to reconstruct accurate three dimensional diffracted intensity peak profiles. 12927 (N-Ac skatole) and 30319 (iron complex) unique reflections were collected up to a resolution of  $\sin\theta_{\max}/\lambda = H/2 = 1.2$  Å $^{-1}$ , where  $H$  is the Bragg vector modulus. An empirical absorption correction was applied using SADABS<sup>1</sup> computer program for the two data sets. SORTAV<sup>2</sup> program was used for sorting and averaging data revealing the excellent quality of the measurements (internal  $R_{\text{int}} = 0.0379$  (N-Ac skatole **1a**) and 0.0486 (iron complex **6a**) with average data redundancy equal to 6.6 (N-Ac skatole **1a**) and 4.5 (iron complex **6a**)). Details of the X-ray diffraction experiment conditions and the crystallographic data for the two compounds are given below.

### *Data Collection and Refinement Details.*

|                                                       | N-Ac skatole <b>1a</b>                                                                                                                         | Iron complex <b>6a</b>                                                                                                                          |
|-------------------------------------------------------|------------------------------------------------------------------------------------------------------------------------------------------------|-------------------------------------------------------------------------------------------------------------------------------------------------|
| Empirical formula                                     | C <sub>11</sub> ONH <sub>11</sub>                                                                                                              | FeCl <sub>3</sub> C <sub>22</sub> O <sub>2</sub> N <sub>2</sub> H <sub>22</sub>                                                                 |
| Formula weight                                        | 173.2                                                                                                                                          | 508.6                                                                                                                                           |
| Temperature (K)                                       | 100.0(1)                                                                                                                                       | 100.0(1)                                                                                                                                        |
| Crystal system                                        | Monoclinic                                                                                                                                     | Monoclinic                                                                                                                                      |
| Space group                                           | P2 <sub>1</sub> /c                                                                                                                             | P2 <sub>1</sub> /c                                                                                                                              |
| Unit cell dimensions                                  | $a = 7.1804(2)$ Å<br>$b = 15.7374(5)$ Å<br>$c = 8.4332(3)$ Å<br>$\alpha = 90.00^\circ$<br>$\beta = 110.775(1)^\circ$<br>$\gamma = 90.00^\circ$ | $a = 7.2974(3)$ Å<br>$b = 19.7534(8)$ Å<br>$c = 15.4873(6)$ Å<br>$\alpha = 90.00^\circ$<br>$\beta = 101.063(2)^\circ$<br>$\gamma = 90.00^\circ$ |
| Volume                                                | 891.00(4)                                                                                                                                      | 2190.98(9) Å <sup>3</sup>                                                                                                                       |
| Z                                                     | 4                                                                                                                                              | 4                                                                                                                                               |
| Density (calculated) (Mg/m <sup>3</sup> )             | 1.290                                                                                                                                          | 1.540                                                                                                                                           |
| Absorption coefficient (mm <sup>-1</sup> )            | 0.083                                                                                                                                          | 1.076                                                                                                                                           |
| $[(\sin \theta) / \lambda]_{\max}$ (Å <sup>-1</sup> ) | 1.23                                                                                                                                           | 1.20                                                                                                                                            |
| # Collected reflections                               | 85100                                                                                                                                          | 135523                                                                                                                                          |
| # Independent reflections                             | 12927 [ $R_{\text{int}} = 0.0379$ ]                                                                                                            | 30319 [ $R_{\text{int}} = 0.0486$ ]                                                                                                             |
| Spherical Refinement                                  |                                                                                                                                                |                                                                                                                                                 |
| $R_1$ , $wR_2$ , gof [ $I > 2\sigma(I)$ ]             | 0.0418, 0.1409, 1.023                                                                                                                          | 0.0353, 0.0917, 1.015                                                                                                                           |
| Multipole Refinement                                  |                                                                                                                                                |                                                                                                                                                 |
| $R_1(F)$ , $wR_2(F)$ , gof [ $I > 3\sigma(I)$ ]       | 0.0268, 0.0223, 1.048                                                                                                                          | 0.0226, 0.0232, 0.997                                                                                                                           |

<sup>1</sup> SADABS (Version 2.10). George Sheldrick, University of Göttingen, 2003

<sup>2</sup> Blessing, R. H. *J. Appl. Crystallogr.* **1997**, 30, 421.

*X-ray crystal structure of iron complex 6a with the numbering scheme.*

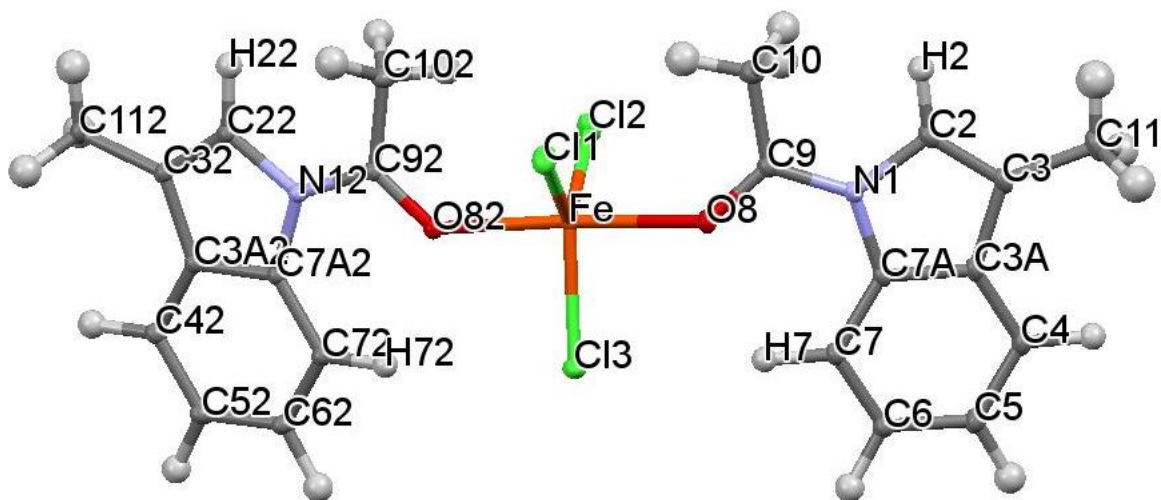

*X-ray crystal structure of N-Ac skatole 1a with the numbering scheme.*

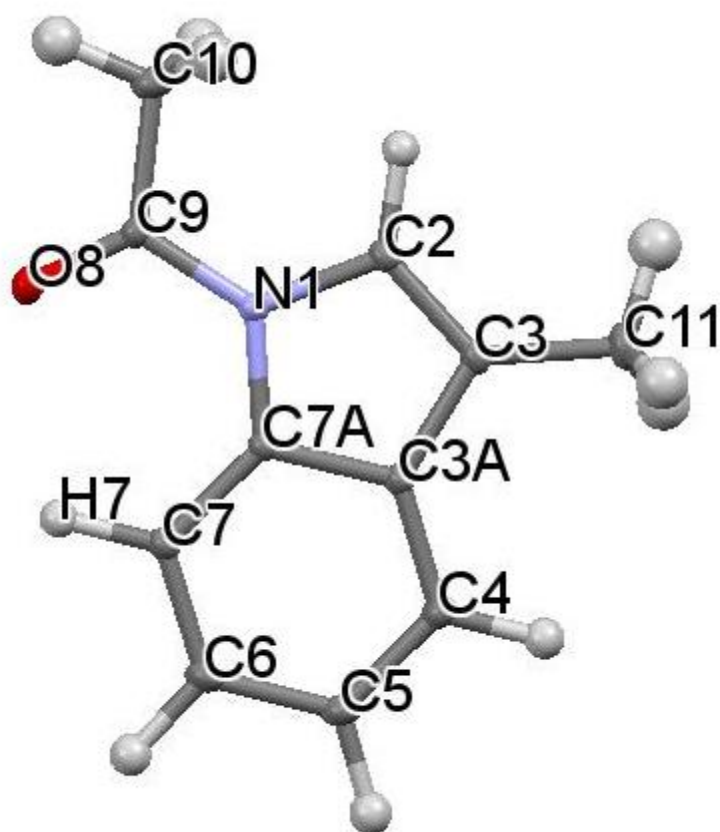

Spherical and Electron Density Refinements. The crystal structures of the two compounds were solved using SIR94 program<sup>3</sup> and refined using SHELX97<sup>4</sup> implemented in WinGX<sup>5</sup> package. For the electron density refinements, the Hansen-Coppens model<sup>6</sup> was used. The frozen core and normalized valence spherical densities are obtained from the Hartree-Fock wave functions of the free atoms or ions.<sup>7</sup> The aspherical part of the pseudo-atom electron density is described by real normalized harmonics  $y_{lm\pm}$  basis set ( $l = 0$  (monopole) to 4 (hexadecapole)) and modulated by a Slater-type radial function  $R_{nl}(r) = Nr^{n_l} \exp(-\xi_l r)$ , where  $N$  is a normalization factor. The exponents  $\xi_l$  (in bohr<sup>-1</sup>) of the radial functions are chosen equal to 3.176, 4.466, 3.839, 4.259, 7.450, for C ( $n_l = 2, 2, 3$  up to octupoles ( $l = 3$ )), O ( $n_l = 2, 2, 3$  up to octupoles ( $l = 3$ )), N ( $n_l = 2, 2, 3$  up to octupoles ( $l = 3$ )), Cl ( $n_l = 4, 4, 6$  up to octupoles ( $l = 3$ )) and Fe ( $n_l = 4, 4, 4$  up to hexadecapoles ( $l = 4$ )) atoms, respectively;  $\xi_l = 2.00$  bohr<sup>-1</sup> and  $n_l = 1$  (dipole level,  $l = 1$ ) for the hydrogen atoms. MOPRO program<sup>8</sup> was used for the electron density refinements against all the structure factors  $F$  with no statistical standard deviations based cut-off ( $I > 0$ ). Indeed, this program combines both conventional and conjugated gradient least-square procedures and requires all observed diffraction intensities. To obtain accurate atomic positions and atomic displacement parameters (ADP's) for non-H atoms, a high-order refinement was carried out using data with  $\sin \theta_{\max} / \lambda > 0.8 \text{ \AA}^{-1}$ ; corresponding parameters for hydrogen atoms were refined against all data. In the first cycles of the refinements, chemical constraints on the multipole parameters were imposed for equivalent atoms of the two compounds.

Electron Density Topology, Atomic Charges and Experimental Electrostatic Potential. Topological features of the total electron density  $\rho(\mathbf{r})$  were revealed using the AIM (Atoms In Molecules) theory of Bader.<sup>9</sup> This analysis allows a quantitative description of the bonds and the electronic structure of atoms in molecules through the gradient and the Laplacian  $\nabla^2 \rho$  of the total electron density. The gradient of the electron density  $\nabla \rho(\mathbf{r}_{CP})$  vanishes at the critical points (CP) corresponding to the extrema and saddle points of  $\rho(\mathbf{r})$ . Each CP is therefore characterized by two numbers: the number of the eigenvalues (for non-degenerating cases) and the signature of the eigenvalues triplet ( $\lambda_1, \lambda_2, \lambda_3$ ). The ellipticity defined by  $\varepsilon = (\lambda_1/\lambda_2 - 1)$  is an index of the type of the chemical bonds ( $\sigma$  or  $\pi$ ). Atomic charges were obtained after the multipole refinement of the electron density. These charges correspond to the integration of the total electron density over the atomic basins defined in the theory of Bader.<sup>14</sup> The electrostatic potential is based on the Hansen-Coppens electron density model.<sup>11, 13</sup> This important property exhibits the nucleophilic (negative potential) and electrophilic (positive potential) regions of the molecule and is a good indicator of the chemical reactivity. Topological features of the electron density, atomic charges and experimental electrostatic potential were obtained using VMOPRO program.<sup>13</sup>

Crystal Structures. The same atomic labels were used for the N-Ac skatole and its iron complex. The main geometrical features of the two compounds are listed below. The bond distances for the two iron-linked

<sup>3</sup> Altomare, A.; Cascarano, G.; Giacovazzo, C.; Guagliardi, A. *J. Appl. Crystallogr.* **1993**, 26, 343.

<sup>4</sup> Sheldrick, G. M. *Acta Crystallogr.* **2008**, A64, 112.

<sup>5</sup> Farrugia, L. J. *WinGX* (Version 1.80.03). *J. Appl. Crystallogr.* **1999**, 32, 837.

<sup>6</sup> Hansen, N. K.; Coppens, P. *Acta Crystallogr.* **1978**, A34, 909.

<sup>7</sup> (a) Clementi, E.; Roetti, C. Atomic data and Nuclear data tables. Academic press, New York, USA, 1974, 14, 177; (b) Clementi, E.; Raimondi, D.L. *J. Chem. Phys.* **1963**, 41, 2686.

<sup>8</sup> (a) Guillot, B.; Viry, L.; Guillot, R.; Lecomte, C.; Jelsch, C. *J. Appl. Crystallogr.* **2000**, 34, 214; (b) Jelsch, C.; Guillot, B.; Lagoutte, A.; Lecomte, C. *J. Appl. Crystallogr.* **2005**, 38, 38.

<sup>9</sup> Bader, R. F. W. *Atoms in Molecules – A Quantum Theory*; Clarendon Press: Oxford, 1990.



molecules are very comparable. When we compare the N-Ac skatole molecule **1a** and its iron complex **6a**, the main differences are found for C9=O8, C9-N1, C2=C3, C2-N1 bonds. The C9=O8 double bond distances of the carbonyl groups of the iron complex **6a** (1.2435 and 1.2437 Å) are longer than the corresponding one in N-Ac skatole **1a** (1.2203 Å). In contrast, the C9-N1 bond distance is shorter for the complex **6a** (1.3534 or 1.3551 Å) than those in the free molecule **1a** (1.3857 Å). It is diagnostic of the more important delocalization of the nitrogen lone pair in the C9=O8 carbonyl for the iron complex **6a** compared to N-Ac skatole **1a**. In addition, the C2=C3 double bond distances are slightly shorter for the complex **6a** (1.3498 and 1.3517 Å) than the one in the isolated molecule **1a** (1.3572 Å), while the C2-N1 bond distance are slightly longer for the complex **6a** (1.4154 and 1.4163) than the one in **1a** (1.4077 Å). It indicates that in the case of the iron complex **6a**, the nitrogen lone pair is indeed less delocalized in the N1-C2=C3 enamide system in comparison to N-Ac skatole **1a**. In the iron complex, we can notice that the Fe-O bond distance (2.09 Å in average) is short compared to the Fe-Cl one (2.21 Å in average). Also, the O-Fe-O and Cl-Fe-Cl bond angle values reveal a slight distortion of the metal coordination polyhedron (bottom).

*Selected bond lengths (Å) and angles (°). The particular features are indicated in bold.  
Standard deviations are given in parentheses.*

| N-Ac skatole <b>1a</b> |                  | Iron complex <b>6a</b> |                  |                       |                   |
|------------------------|------------------|------------------------|------------------|-----------------------|-------------------|
| <b>C9 - O8</b>         | <b>1.2203(1)</b> | <b>C9 - O8</b>         | <b>1.2435(2)</b> | <b>C92 - O82</b>      | <b>1.2437(2)</b>  |
| <b>C9 - N1</b>         | <b>1.3857(1)</b> | <b>C9 - N1</b>         | <b>1.3534(2)</b> | <b>C92 - N12</b>      | <b>1.3551(2)</b>  |
| C9 - C10               | 1.5033(1)        | C9 - C10               | 1.4912(2)        | C92 - C102            | 1.4948(2)         |
| C2 - N1                | 1.4077(1)        | C2 - N1                | 1.4154(2)        | C22 - N12             | 1.4163(2)         |
| <b>C2 - C3</b>         | <b>1.3572(1)</b> | <b>C2 - C3</b>         | <b>1.3498(2)</b> | <b>C22 - C32</b>      | <b>1.3517(2)</b>  |
| C3 - C3a               | 1.4459(1)        | C3 - C3a               | 1.4521(2)        | C32 - C3a2            | 1.4520(2)         |
| C3 - C11               | 1.4883(1)        | C3 - C11               | 1.4857(2)        | C32 - C112            | 1.4859(2)         |
| C3a - C7a              | 1.4096(1)        | C3a - C7a              | 1.4053(2)        | C3a2 - C7a2           | 1.4059(2)         |
| C3a - C4               | 1.3961(1)        | C3a - C4               | 1.3935(2)        | C3a2 - C42            | 1.3941(2)         |
| C4 - C5                | 1.3904(1)        | C4 - C5                | 1.3901(2)        | C42 - C52             | 1.3906(2)         |
| C5 - C6                | 1.4040(1)        | C5 - C6                | 1.3991(2)        | C52 - C62             | 1.3977(2)         |
| C6 - C7                | 1.3943(1)        | C6 - C7                | 1.3941(2)        | C62 - C72             | 1.3951(2)         |
| C7 - C7a               | 1.3938(1)        | C7 - C7a               | 1.3916(2)        | C72 - C7a2            | 1.3902(2)         |
| C7a - N1               | 1.4030(1)        | C7a - N1               | 1.4126(2)        | C7a2 - N12            | 1.4128(2)         |
|                        |                  |                        |                  | O8 - Fe               | 2.0988(1)         |
|                        |                  |                        |                  | O82 - Fe              | 2.0867(1)         |
|                        |                  |                        |                  | Cl1 - Fe              | 2.2143(1)         |
|                        |                  |                        |                  | Cl2 - Fe              | 2.2166(1)         |
|                        |                  |                        |                  | Cl3 - Fe              | 2.2180(1)         |
|                        |                  |                        |                  | <b>O8 - Fe - O82</b>  | <b>173.75(1)</b>  |
|                        |                  |                        |                  | <b>Cl1 - Fe - Cl3</b> | <b>120.674(8)</b> |
|                        |                  |                        |                  | <b>Cl1 - Fe - Cl2</b> | <b>116.369(7)</b> |
|                        |                  |                        |                  | <b>Cl2 - Fe - Cl3</b> | <b>122.953(7)</b> |

*Static Electron Densities and Topological Features.* Below are displayed the static electron deformation densities of the two compounds. The atomic bond covalent character of the organic part of the two compounds is clearly shown. As expected, the electron concentration in the C2=C3 double and the C=O bonds is slightly higher than for the other C-C, C-H and C-N bonds. Furthermore, for the two compounds the electron density oxygen lone pairs are clearly depicted. In the iron complex, these lone pairs are polarized toward the metal atom for both O8

and O82 as shown. The chlorine electron density is also polarized toward the Fe ion which displays electron concentration lobes in the direction of the oxygen atoms and electron depletion ones toward the chlorine atoms.

*Static electron deformation density for the N-Ac skatole 1a (top) and the iron complex 6a (bottom).*

*Contours are  $\pm 0.05 \text{ e}\text{\AA}^{-3}$ , negative contours are in red.*

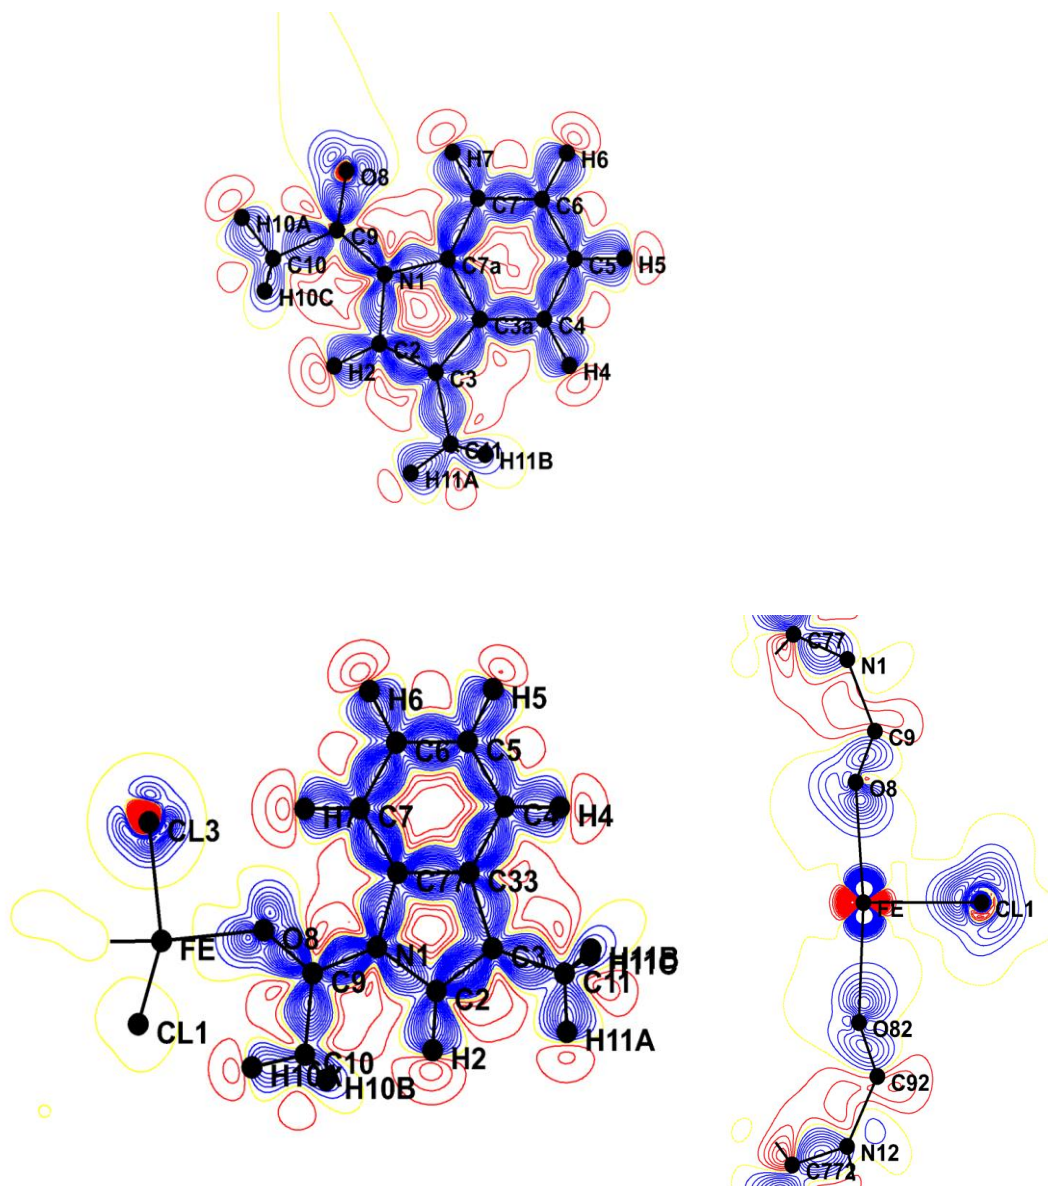

As described in the previous section, the total electron density was analyzed using the AIM theory.<sup>14</sup> The topological properties of the atomic bonds are listed in below. In the Bader's theory, negative Laplacian values at the bond critical point (CP) indicate shared-shell (or covalent) interactions. In contrast, positive Laplacian values correspond to closed-shell (or ionic) interactions. Such interactions are observed in the vicinity of the iron ion. As shown in next table, both O-Fe and Cl-Fe exhibit the same properties ( $\rho = 0.47 \text{ e}\text{\AA}^{-3}$ ,  $\nabla^2\rho = 7.34 \text{ e}\text{\AA}^{-5}$  and  $\varepsilon$  close to 0.0). All the bonds in the organic parts are characterized by negative Laplacian of the electron density. It is worthy to note that, during the metal complexation, the sensitive parts of the N-Ac skatole are the C9-O8 and C9-

N1 bonds. Both the electron density and the Laplacian values at the bond critical point are higher for the C9-N1 bond ( $\rho = 2.099 \text{ e}\text{\AA}^{-3}$ ,  $\nabla^2\rho = -21.03 \text{ e}\text{\AA}^{-5}$  in N-Ac skatole compared to the iron complex ( $\rho = 2.360$  and  $2.297 \text{ e}\text{\AA}^{-3}$ ,  $\nabla^2\rho = -26.27$  and  $-22.24 \text{ e}\text{\AA}^{-5}$ ). For the C9-O8 bond, the isolated molecule exhibit a significant higher electron density peak ( $\rho = 2.951 \text{ e}\text{\AA}^{-3}$  compared to  $2.795$  and  $2.757 \text{ e}\text{\AA}^{-3}$  for the complex); the Laplacian, however, is slightly lower ( $\nabla^2\rho = -27.46$  compared to  $-29.82$  and  $-27.93 \text{ e}\text{\AA}^{-5}$  for the complex). For the other bonds in the organic parts, we found the highest values of both  $\rho$  and  $\nabla^2\rho$  in the aromatic rings. Among these bonds, C2-C3 one displays large values of  $\rho$  and  $\nabla^2\rho$  ( $2.314 \text{ e}\text{\AA}^{-3}$  and  $-21.38 \text{ e}\text{\AA}^{-5}$  in N-Ac skatole;  $2.387$ ,  $2.371 \text{ e}\text{\AA}^{-3}$  and  $-23.56$ ,  $-22.43 \text{ e}\text{\AA}^{-5}$  for the complex). For this last bond, we can notice that both  $\rho$  and  $\nabla^2\rho$  are enhanced in the iron complex. Moreover, for the studied compounds, all the bonds having high peaks of electron density also exhibit high values of ellipticities  $\varepsilon$  corresponding to the  $\pi$ -character. The highest values were found for C2-C3 bond ( $\varepsilon = 0.28$  (N-Ac skatole),  $\varepsilon = 0.30$  and  $0.32$  (iron complex)). The lowest values (close to 0.0) were found for both C-H in the organic part, Fe-O and Fe-Cl bonds.

**Topological properties of N-Ac skatole 1a and the Iron complex 6a.**

$\rho(r_{CP})$  (in  $e\text{\AA}^{-3}$ ) and  $\nabla^2\rho(r_{CP})$  (in  $e\text{\AA}^{-5}$ ) are the electron density and the Laplacian values at the critical points (CP);  $\varepsilon$  is the ellipticity of the bond. High values of  $\rho$  and  $\nabla^2\rho$  are given in bold.

| N-Ac skatole 1a  |                |                        |               | Iron complex 6a  |                |                        |               |                    |                |                        |               |
|------------------|----------------|------------------------|---------------|------------------|----------------|------------------------|---------------|--------------------|----------------|------------------------|---------------|
| Bond             | $\rho(r_{CP})$ | $\nabla^2\rho(r_{CP})$ | $\varepsilon$ | Bond             | $\rho(r_{CP})$ | $\nabla^2\rho(r_{CP})$ | $\varepsilon$ | Bond               | $\rho(r_{CP})$ | $\nabla^2\rho(r_{CP})$ | $\varepsilon$ |
| C9 - C10         | 1.769          | -13.04                 | 0.09          | C9 - C10         | 1.811          | -14.06                 | 0.06          | C92 - C102         | 1.790          | -13.16                 | 0.09          |
| <b>C9 - N1</b>   | <b>2.099</b>   | <b>-21.03</b>          | <b>0.15</b>   | <b>C9 - N1</b>   | <b>2.360</b>   | <b>-26.27</b>          | <b>0.20</b>   | <b>C92 - N12</b>   | <b>2.297</b>   | <b>-22.24</b>          | <b>0.10</b>   |
| <b>C9 - O8</b>   | <b>2.951</b>   | <b>-27.46</b>          | <b>0.10</b>   | <b>C9 - O8</b>   | <b>2.795</b>   | <b>-29.82</b>          | <b>0.09</b>   | <b>C92 - O82</b>   | <b>2.757</b>   | <b>-27.93</b>          | <b>0.06</b>   |
| C10 - H10A       | 1.700          | -14.90                 | 0.07          | C10 - H10A       | 1.715          | -16.01                 | 0.09          | C102 - H102A       | 1.716          | -18.32                 | 0.10          |
| C10 - H10B       | 1.766          | -15.43                 | 0.08          | C10 - H10B       | 1.713          | -16.91                 | 0.07          | C102 - H102B       | 1.691          | -16.33                 | 0.09          |
| C10 - H10C       | 1.700          | -15.25                 | 0.05          | C10 - H10C       | 1.770          | -16.71                 | 0.07          | C102 - H102C       | 1.709          | -15.71                 | 0.08          |
| C2 - H2          | 1.775          | -19.44                 | 0.07          | C2 - H2          | 1.776          | -19.42                 | 0.00          | C22 - H22          | 1.862          | -22.12                 | 0.06          |
| <b>C2 - C3</b>   | <b>2.314</b>   | <b>-21.38</b>          | <b>0.28</b>   | <b>C2 - C3</b>   | <b>2.387</b>   | <b>-23.56</b>          | <b>0.30</b>   | <b>C22 - C32</b>   | <b>2.371</b>   | <b>-22.43</b>          | <b>0.32</b>   |
| C2 - N1          | 1.985          | -15.40                 | 0.17          | C2 - N1          | 1.957          | -14.84                 | 0.11          | C22 - N12          | 1.965          | -14.62                 | 0.22          |
| C3 - C3a         | 1.941          | -14.17                 | 0.15          | C3 - C3a         | 1.944          | -14.70                 | 0.11          | C32 - C3a2         | 1.939          | -14.56                 | 0.09          |
| C3 - C11         | 1.786          | -12.80                 | 0.08          | C3 - C11         | 1.783          | -13.39                 | 0.11          | C32 - C112         | 1.775          | -12.48                 | 0.06          |
| <b>C3a - C4</b>  | <b>2.115</b>   | <b>-18.68</b>          | <b>0.20</b>   | <b>C3a - C4</b>  | <b>2.142</b>   | <b>-18.75</b>          | <b>0.22</b>   | <b>C3a2 - C42</b>  | <b>2.166</b>   | <b>-19.47</b>          | <b>0.26</b>   |
| <b>C3a - C7a</b> | <b>2.114</b>   | <b>-17.76</b>          | <b>0.20</b>   | <b>C3a - C7a</b> | <b>2.146</b>   | <b>-17.67</b>          | <b>0.21</b>   | <b>C3a2 - C7a2</b> | <b>2.165</b>   | <b>-17.75</b>          | <b>0.15</b>   |
| C4 - H4          | 1.778          | -17.66                 | 0.04          | C4 - H4          | 1.739          | -16.95                 | 0.05          | C42 - H42          | 1.816          | -18.18                 | 0.05          |
| <b>C4 - C5</b>   | <b>2.172</b>   | <b>-19.83</b>          | <b>0.19</b>   | <b>C4 - C5</b>   | <b>2.119</b>   | <b>-18.69</b>          | <b>0.19</b>   | <b>C42 - C52</b>   | <b>2.193</b>   | <b>-20.41</b>          | <b>0.22</b>   |
| C5 - H5          | 1.765          | -17.16                 | 0.06          | C5 - H5          | 1.830          | -18.86                 | 0.06          | C52 - H52          | 1.777          | -17.87                 | 0.08          |
| <b>C5 - C6</b>   | <b>2.151</b>   | <b>-18.89</b>          | <b>0.18</b>   | <b>C5 - C6</b>   | <b>2.176</b>   | <b>-19.83</b>          | <b>0.18</b>   | <b>C52 - C62</b>   | <b>2.122</b>   | <b>-18.17</b>          | <b>0.20</b>   |
| C6 - H6          | 1.763          | -17.80                 | 0.05          | C6 - H6          | 1.840          | -20.08                 | 0.06          | C62 - H62          | 1.802          | -18.18                 | 0.03          |
| <b>C6 - C7</b>   | <b>2.129</b>   | <b>-18.51</b>          | <b>0.18</b>   | <b>C6 - C7</b>   | <b>2.214</b>   | <b>-21.74</b>          | <b>0.14</b>   | <b>C62 - C72</b>   | <b>2.126</b>   | <b>-18.25</b>          | <b>0.19</b>   |
| C7 - H7          | 1.792          | -18.18                 | 0.04          | C7 - H7          | 1.781          | -18.29                 | 0.07          | C72 - H72          | 1.814          | -18.56                 | 0.07          |
| <b>C7 - C7a</b>  | <b>2.167</b>   | <b>-19.06</b>          | <b>0.23</b>   | <b>C7 - C7a</b>  | <b>2.195</b>   | <b>-20.47</b>          | <b>0.23</b>   | <b>C72 - C7a2</b>  | <b>2.168</b>   | <b>-19.53</b>          | <b>0.20</b>   |
| C7a - N1         | 1.995          | -15.42                 | 0.13          | C7a - N1         | 1.997          | -16.02                 | 0.09          | C7a2 - N12         | 2.004          | -15.32                 | 0.08          |
| C11 - H11A       | 1.727          | -14.16                 | 0.12          | C11 - H11A       | 1.720          | -15.45                 | 0.08          | C112 - H112A       | 1.730          | -16.24                 | 0.08          |
| C11 - H11B       | 1.658          | -14.04                 | 0.11          | C11 - H11B       | 1.689          | -16.22                 | 0.07          | C112 - H112B       | 1.720          | -15.60                 | 0.08          |
| C11 - H11C       | 1.636          | -14.21                 | 0.10          | C11 - H11C       | 1.643          | -14.83                 | 0.08          | C112 - H112C       | 1.687          | -16.72                 | 0.11          |
|                  |                |                        |               |                  |                |                        |               |                    |                |                        |               |
| Bond             | $\rho(r_{CP})$ | $\nabla^2\rho(r_{CP})$ | $\varepsilon$ |                  |                |                        |               |                    |                |                        |               |
| O8 - Fe          | 0.430          | 7.53                   | 0.03          |                  |                |                        |               |                    |                |                        |               |
| O82 - Fe         | 0.466          | 7.79                   | 0.02          |                  |                |                        |               |                    |                |                        |               |
| Cl1 - Fe         | 0.490          | 7.13                   | 0.01          |                  |                |                        |               |                    |                |                        |               |
| Cl2 - Fe         | 0.491          | 7.13                   | 0.00          |                  |                |                        |               |                    |                |                        |               |
| Cl3 - Fe         | 0.488          | 7.12                   | 0.00          |                  |                |                        |               |                    |                |                        |               |

Atomic Charges. The integrated atomic charges for the two compounds are listed below. The highest negative charges are carried by respectively N1 (-0.99 e in N-Ac skatole increasing to -1.05 e in the iron complex), O8 (-1.14 e in N-Ac skatole which decreases to -1.27 e in the iron complex), and chlorine atoms (-0.6 e in average). The highest positive charge is found obviously for iron ion (+0.94 e). No particular features were observed for the other atoms in the organic parts of the two compounds. It is worthy to note, however, that C2 and C3 which are involved in the strong double bond are close to be neutral.

***Atomic charges (in e) of 1a and 6a.***

| N-Ac skatole <b>1a</b> |               | Iron complex <b>6a</b> |               |            |               |
|------------------------|---------------|------------------------|---------------|------------|---------------|
| C9                     | 1.293         | C9                     | 1.212         | C92        | 1.244         |
| C10                    | -0.242        | C10                    | -0.255        | C102       | -0.372        |
| H10A                   | 0.168         | H10A                   | 0.227         | H102A      | 0.267         |
| H10B                   | 0.054         | H10B                   | 0.231         | H102B      | 0.259         |
| H10C                   | 0.202         | H10C                   | 0.177         | H102C      | 0.231         |
| <b>C2</b>              | <b>0.088</b>  | <b>C2</b>              | <b>-0.005</b> | <b>C22</b> | <b>0.004</b>  |
| H2                     | 0.296         | H2                     | 0.332         | H22        | 0.338         |
| <b>C3</b>              | <b>-0.057</b> | <b>C3</b>              | <b>0.121</b>  | <b>C32</b> | <b>-0.110</b> |
| C3a                    | -0.013        | C3a                    | -0.089        | C3a2       | -0.066        |
| C4                     | -0.093        | C4                     | -0.051        | C42        | -0.180        |
| H4                     | 0.144         | H4                     | 0.267         | H42        | 0.226         |
| C5                     | -0.209        | C5                     | -0.127        | C52        | -0.228        |
| H5                     | 0.161         | H5                     | 0.169         | H52        | 0.200         |
| C6                     | -0.243        | C6                     | -0.162        | C62        | -0.018        |
| H6                     | 0.177         | H6                     | 0.231         | H62        | 0.158         |
| C7                     | -0.110        | C7                     | -0.049        | C72        | -0.112        |
| H7                     | 0.213         | H7                     | 0.309         | H72        | 0.257         |
| C7a                    | 0.220         | C7a                    | 0.140         | C7a2       | 0.107         |
| C11                    | -0.330        | C11                    | -0.365        | C112       | -0.414        |
| H11A                   | 0.074         | H11A                   | 0.203         | H112A      | 0.240         |
| H11B                   | 0.150         | H11B                   | 0.228         | H112B      | 0.197         |
| H11C                   | 0.192         | H11C                   | 0.279         | H112C      | 0.236         |
| N1                     | -0.993        | N1                     | -1.074        | N12        | -1.034        |
| O8                     | -1.140        | O8                     | -1.266        | O82        | -1.267        |
|                        |               |                        |               | Cl1        | -0.581        |
|                        |               |                        |               | Cl2        | -0.622        |
|                        |               |                        |               | Cl3        | -0.575        |
|                        |               |                        |               | Fe         | 0.938         |

Electrostatic Potential. Next figure depicts the electrostatic potential features obtained after the multipole refinement of the electron density. For the N-Ac skatole, the minimum of the electrostatic potential ( $-0.109 \text{ e}\text{\AA}^{-1}$ ) is found in the vicinity of the O8 oxygen atom. All other parts of the molecule is surrounded by a positive electrostatic potential. For the iron complex, the positive charge ( $+0.938 \text{ e}$ ) of the iron ion is screened by the negative ones carried by the three chlorine and the two oxygen atoms ( $-0.6 \text{ e}$  in average). This gives rise to deep negative potential between O and Cl atoms reaching  $-0.352 \text{ e}\text{\AA}^{-1}$ . The other maps show the electrostatic potential in the plane perpendicular to the C2=C3 double bond. A weak negative potential is found in either side of the bond ( $-0.03 \text{ e}\text{\AA}^{-1}$ ) in the N-Ac skatole molecule. For the iron complex, however, C2=C3 and C22=C32 bonds exhibit different features, the last bond presenting a deeper electrostatic potential ( $-0.1 \text{ e}\text{\AA}^{-1}$ ). This implies that the two molecules should not be equivalent in the chemical reactivity or in the hydroarylation reaction.

*Electrostatic potential maps for N-Ac skatole 1a (left column) and for the iron complex 6a (right column). Maps in the bottom part correspond to the electrostatic potential in the perpendicular plane to the C2-C3 and C22-C32 bonds.*

*Contours are  $\pm 0.05 \text{ e}\text{\AA}^{-1}$  for N-Ac skatole and for the iron complex and  $\pm 0.01 \text{ e}\text{\AA}^{-1}$  for the C2-C3 and C22-C32 bonds. Negative contours are in red and positive ones are in blue.*

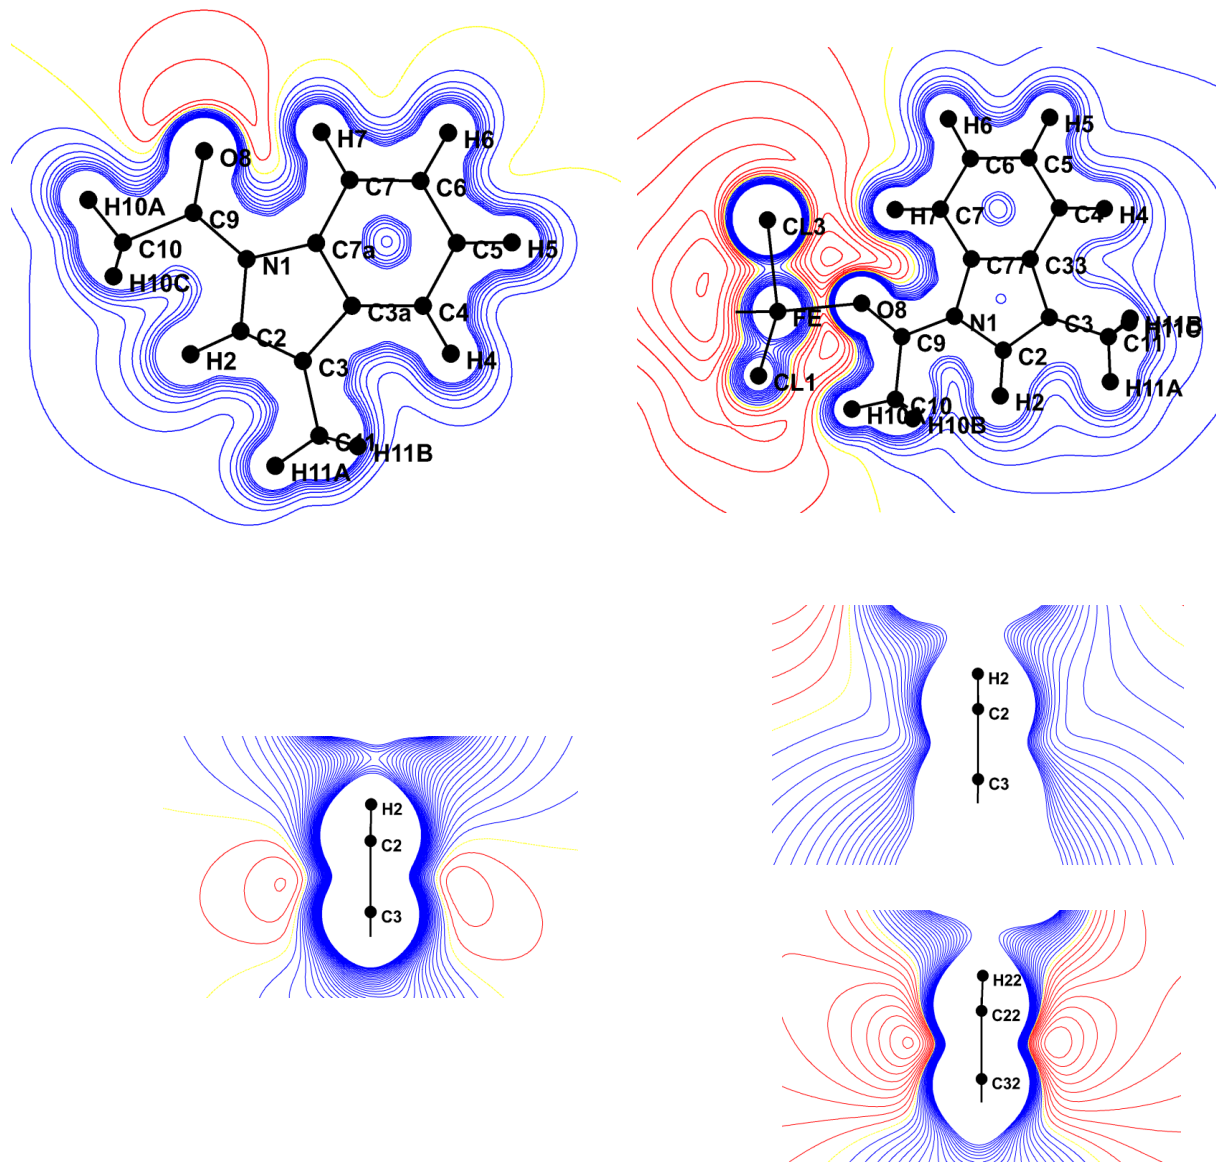

## I.6 DFT study

**Computations details:** All the calculations were performed using the GAUSSIAN 09 software package.<sup>10</sup> The structures were optimized and characterized to be energy minima or transition states at the unrestricted B3PW91, B3LYP,<sup>11</sup> BP86,<sup>12</sup> M06, and M06-2X<sup>13</sup> levels. A spin of 6 was used for compounds with one iron atom, and of 11 for compounds with two iron atoms. The effective-core potential of Hay and Wadt with a double- $\xi$  valence basis set (LANL2DZ) was used to describe Fe.<sup>14</sup> The other atoms were described by the 6-31G(d,p) basis set. Thermal corrections to Gibbs free energies were carried out at 298.15 K under 1 atm using the harmonic frequencies. Solvation energy in CH<sub>2</sub>Cl<sub>2</sub> was obtained using the PCM model. Natural charges were obtained using the NBO 3.1 program implemented in Gaussian 09.

**Reaction pathways:** We considered the activation of **1** (R = (CH<sub>2</sub>)<sub>3</sub>Ph) towards hydroarylation by either one or two FeCl<sub>3</sub> molecules coordinated to the oxygen atom (n = 1 or 2, m = 0). Relaxed scans were performed showing that bringing C3 and C $\alpha$  closer together until 1.5 Å resulted in a continuous rise of the energy of the system. Consistently, no transition state could be found. The same was true after coordination of the C2=C3 bond by FeCl<sub>3</sub> (m = 1), with or without complexation of the oxygen atom.

*Unfavorable pathways studied by DFT computations: no activation or activation of the C2=C3 bond by FeCl<sub>3</sub>.*

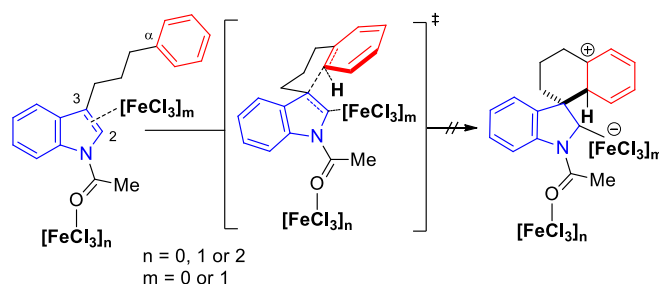

We then reasoned that the use of an excess of FeCl<sub>3</sub> might give rise to protons if traces of water were present. Various combinations of FeCl<sub>3</sub> and H<sup>+</sup> were tested at both coordination sites, among which only two allowed to

<sup>10</sup> Gaussian 09, Revision D.01, M. J. Frisch, G. W. Trucks, H. B. Schlegel, G. E. Scuseria, M. A. Robb, J. R. Cheeseman, G. Scalmani, V. Barone, B. Mennucci, G. A. Petersson, H. Nakatsuji, M. Caricato, X. Li, H. P. Hratchian, A. F. Izmaylov, J. Bloino, G. Zheng, J. L. Sonnenberg, M. Hada, M. Ehara, K. Toyota, R. Fukuda, J. Hasegawa, M. Ishida, T. Nakajima, Y. Honda, O. Kitao, H. Nakai, T. Vreven, J. A. Montgomery, Jr., J. E. Peralta, F. Ogliaro, M. Bearpark, J. J. Heyd, E. Brothers, K. N. Kudin, V. N. Staroverov, R. Kobayashi, J. Normand, K. Raghavachari, A. Rendell, J. C. Burant, S. S. Iyengar, J. Tomasi, M. Cossi, N. Rega, J. M. Millam, M. Klene, J. E. Knox, J. B. Cross, V. Bakken, C. Adamo, J. Jaramillo, R. Gomperts, R. E. Stratmann, O. Yazyev, A. J. Austin, R. Cammi, C. Pomelli, J. W. Ochterski, R. L. Martin, K. Morokuma, V. G. Zakrzewski, G. A. Voth, P. Salvador, J. J. Dannenberg, S. Dapprich, A. D. Daniels, Ö. Farkas, J. B. Foresman, J. V. Ortiz, J. Cioslowski, and D. J. Fox, Gaussian, Inc., Wallingford CT, 2009.

<sup>11</sup> (a) A. D. Becke, *J. Chem. Phys.* **1993**, 98, 5648-5652. (b) C. Lee, W. Yang, R. G. Parr, *Phys. Rev. B*, **1988**, 37, 785-789. (c) S. H. Vosko, L. Wilk, M. Nusair, *Can. J. Phys.* **1980**, 58, 1200-1211. (d) P. J. Stephens, F. J. Devlin, C. F. Chabalowski, M. J. Frisch, *J. Phys. Chem.* **1994**, 98, 11623-11627.

<sup>12</sup> (a) A. D. Becke, *Phys. Rev. A*, **1988**, 38, 3098-3100. (b) J. P. Perdew, *Phys. Rev. B*, **1986**, 33, 8822-8824.

<sup>13</sup> Y. Zhao, D. G. Truhlar, The M06 Suite of Density Functionals for Main Group Thermochemistry, Thermochemical Kinetics, Noncovalent Interactions, Excited States, and Transition Elements. *Theor. Chem. Acc.* **2008**, 120, 215-241.

<sup>14</sup> P. J. Hay, W. R. Wadt, *J. Chem. Phys.* **1985**, 82, 299-310.

locate hydroarylation transition states: one FeCl<sub>3</sub> at O and H<sup>+</sup> at C2=C3 (see **A1** to **B1**), and two FeCl<sub>3</sub> at O and H<sup>+</sup> at C2=C3 (see **A2** to **B2**).

*Favorable activation of the acetyl by FeCl<sub>3</sub> and of the C2=C3 bond by a proton studied by DFT computations.*

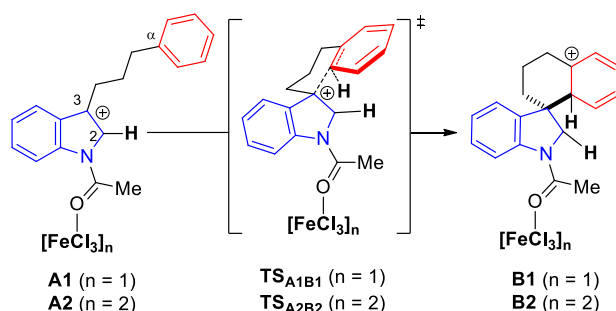

*Computed Gibbs free energies (kcal/mol) relatively to A1 or B1.*

|        | <b>TS<sub>A1B1</sub></b> |                          | <b>B1</b>        |                          | <b>TS<sub>A2B2</sub></b> |                          | <b>B2</b>        |                          |
|--------|--------------------------|--------------------------|------------------|--------------------------|--------------------------|--------------------------|------------------|--------------------------|
|        | $\Delta G_{298}$         | $\Delta G_{\text{solv}}$ | $\Delta G_{298}$ | $\Delta G_{\text{solv}}$ | $\Delta G_{298}$         | $\Delta G_{\text{solv}}$ | $\Delta G_{298}$ | $\Delta G_{\text{solv}}$ |
| B3PW91 | 10.1                     | 5.2                      | 8.5              | -11.2                    | 6.4                      | -0.6                     | 2.9              | -12.2                    |
| B3LYP  | 13.1                     | 6.4                      | 12.4             | -9.6                     | 8.3                      | 1.9                      | 6.3              | -9.3                     |
| BP86   | 9.8                      | 2.4                      | 9.6              | -8.3                     | 6.3                      | -2.9                     | 4.6              | -7.6                     |
| M06    | 7.1                      | 3.5                      | 4.4              | -10.1                    | -                        | -                        | -                | -                        |
| M06-2X | 5.3                      | 2.8                      | 3.3              | -10.2                    | 3.0                      | 0.4                      | 0.6              | -13.9                    |

The Gibbs free energies were obtained using the various functionals for the iron complexes. In the absence of solvent correction, with one FeCl<sub>3</sub>, the Gibbs free energies of activation greatly vary ( $\Delta G_{298}$  5.3-10.1 kcal/mol for **TS<sub>A1B1</sub>**) but all barriers are accessible under the experimental conditions used. The formation of the Wheland intermediates **B1** is endergonic ( $\Delta G_{298}$  3.3 to 12.4 kcal/mol). With solvent correction, the activation energies are significantly reduced ( $\Delta G_{\text{solv}}$  2.8 to 6.4 kcal/mol for **TS<sub>A1B1</sub>**) and the Wheland intermediates **B1** greatly stabilized so that the reaction becomes exergonic ( $\Delta G_{\text{solv}}$  -8.3 to -11.2 kcal/mol). The electron depletion along the C2=C3 bond promoted by the coordination of a second FeCl<sub>3</sub> molecule to O reduces markedly all Gibbs free of activation, with or without solvent correction. At the B3PW91 and BP86 levels, the transition states are more stable than the starting compounds, which is a computational artefact. At the M06 level, **TS<sub>A2B2</sub>** did not converge.

The geometries of the computed M06-2X iron complexes are displayed below. The effect of the double coordination of the oxygen atom materializes in the forming C3-C $\alpha$  bond which is longer in **TS<sub>A2B2</sub>** than in **TS<sub>A1B1</sub>** (2.22 vs 2.12 Å), hence the lower activation energy. In the same vein, it should be mentioned that the natural charge at C3 significantly increases from one to two FeCl<sub>3</sub> in the starting compounds, from 0.275 to 0.293.



*M06-2X Geometries of the iron complexes (selected distances in Å)*

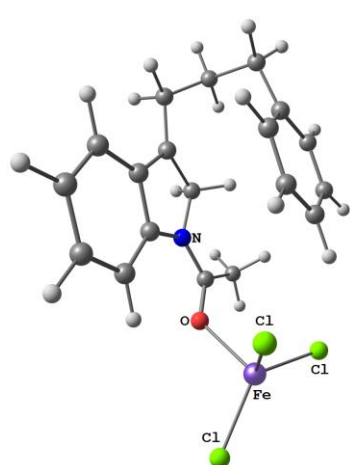

**A1**

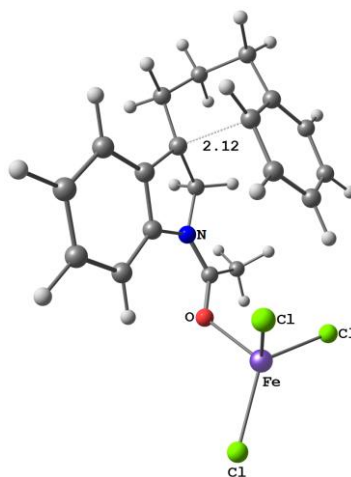

**TSA1B1**

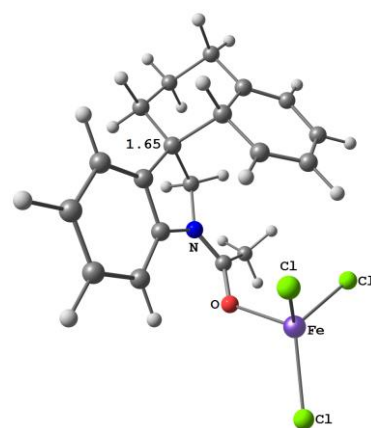

**B1**

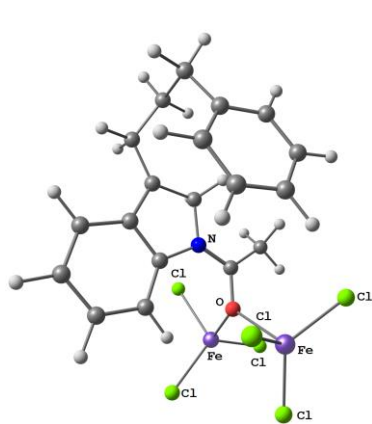

**A2**

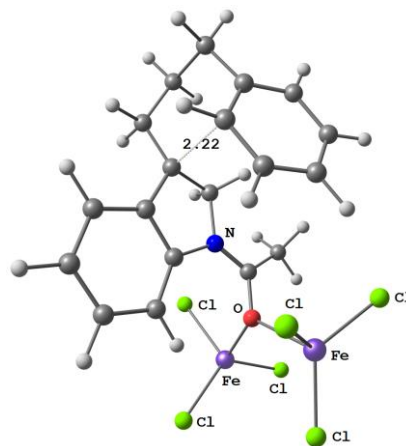

**TSA2B2**

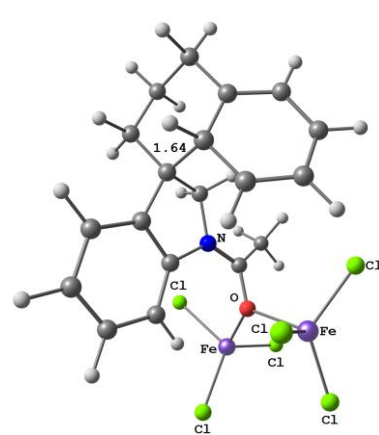

**B2**

## II. Experimental details

### II.1 General Informations

Unless otherwise stated, all reactions were carried out under air atmosphere. Dichloromethane was distilled under argon over  $\text{CaH}_2$ . Tetrahydrofuran was distilled under argon over sodium-benzophenone. Unless otherwise noted, all reagent-grade chemicals and other solvents were obtained from commercial suppliers and were used as received. Reactions were monitored with analytical thin-layer chromatography (TLC) on silica gel 60 F254 plates and visualized under UV (254 nm) and/or by staining with vanillin (1%) + sulfuric acid (5%) in EtOH or  $\text{KMnO}_4$  solution followed by heating. Flash chromatography were performed on silica gel (Chromagel Si60ACC [70-200  $\mu\text{m}$ ]) as stationary phase.  $^1\text{H}$  NMR spectra were recorded on Bruker AC250 (250 MHz), Bruker DRX300 (300 MHz), Bruker AM360 (360 MHz) and Bruker 400 (400 MHz) instruments; chemical shifts ( $\delta$ ) are given in parts per million with respect to the residual protonated solvent ( $\delta = 7.26$  ppm for  $\text{CDCl}_3$ ), which served as an internal standard.  $^{13}\text{C}$  NMR spectra were recorded on Bruker AC250 (62 MHz), DRX300 (75 MHz), AM360 (90 MHz) and; chemical shifts are expressed with respect to the deuterated solvent ( $\delta = 77.23$  ppm for  $\text{CDCl}_3$ ). Coupling constant(s) in hertz (Hz) were measured from one-dimensional spectra and multiplicities were abbreviated as following: br (broad), s (singlet), d (doublet), t (triplet), q (quadruplet), m (multiplet). Infrared spectra were recorded as neat on a Bruker Vertex 70 with ATR-GE spectrometer. High resolution mass spectra (HRMS) were recorded using Electrospray Ionization (ESI) method with a Bruker Daltonics MicroTOF-Q instrument. HPLC analyses were conducted on Dionex instrument (Ultimate 3000) in our laboratory. This instrument is principally composed of gradient pump, Peltier effect column oven and Diodes array detector.

## II.2 Preparation of N-Ac indoles

Most of the N-Ac indoles were described in previous reports from us: (**1a**, **1d-e**, **1l-o**, **1r**, **1t**)<sup>15</sup> and (**1b-c**, **1k**, **1q**).<sup>16</sup>

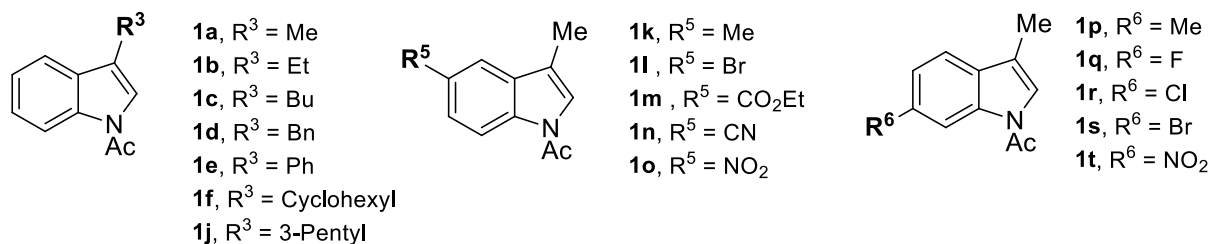

**1f**, **1j**, **1p**, **1s** were synthesized using the following protocols.

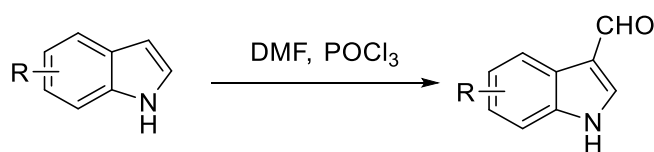

### General Procedure A

Phosphorus oxychloride (1.2 equivalents) was added dropwise to DMF (0.3 mL/mmol indole) with ice-bath. The mixture was stirred for 5 minutes then added dropwise to a solution of indole (1 equivalent) in DMF (0.3 mL/mmol indole) at 0 °C. The mixture was then to warm to room temperature and stirred for 30 minutes. The reaction became a heavy suspension that required vigorous stirring. 5.0 M aqueous potassium hydroxide was added until pH > 9 and the mixture was heated at 100 °C for 2 hours. The resulting suspension was cooled down to 0 °C, the precipitate was filtered off, washed with water then dried under vacuum overnight and used in the next step without further purification.

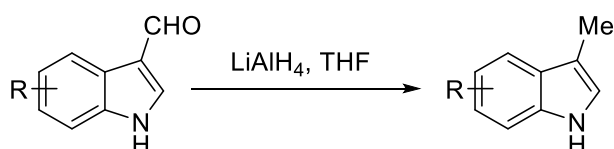

### General procedure B

To a suspension of LiAlH<sub>4</sub> (2.5 equivalents) in THF (10 mL/mmol of indole) at 0 °C under argon atmosphere was added 3-formylindole (1 equivalent) over spatula. The suspension was then stirred at 70 °C for 4 hours. The reaction was cooled down to 0 °C, distilled water (100 μL/mmol of 3-formylindole) was added dropwise followed by 10% aqueous solution of NaOH (100 μL/mmol of 3-formylindole) and again H<sub>2</sub>O (300 μL/mmol of 3-formylindole). The resulting slurry was stirred vigorously for 30 minutes, diluted with Et<sub>2</sub>O and anhydrous MgSO<sub>4</sub> was added. The white precipitate was filtered on Celite then washed with Et<sub>2</sub>O. The solvent was removed under vacuum and the product was used in the next step without further purification.

<sup>15</sup> Beaud, R.; Guillot, R.; Kouklovsky, C.; Vincent, G. *Chem. – Eur. J.* **2014**, 20, 7492.

<sup>16</sup> Tomakinian, T.; Guillot, R.; Kouklovsky, C.; Vincent, G. *Angew. Chem. Int. Ed.* **2014**, 53, 11881.

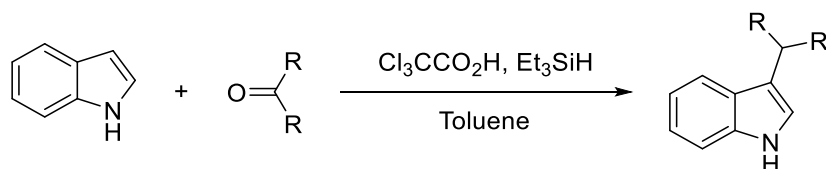

### General procedure C

To a stirred solution of trichloroacetic acid (1.5 equivalents) in toluene (0.5 mL/mmol of indole) was added Et<sub>3</sub>SiH (3 equivalents) and the resulting mixture was heated at 70 °C for 30 minutes. A solution of indole (1 equivalent) and 3-pentanone (1.1 equivalents) in toluene (0.5 mL/mmol of indole) was added and the reaction was heated at 70 °C for 3 hours. The resulting mixture was cooled down to 0 °C then quenched with sat. aq. Na<sub>2</sub>CO<sub>3</sub> solution. The organic layer was diluted with EtOAc, separated and the aqueous layer was extracted twice with EtOAc. Combined organic layers were washed with brine, dried over MgSO<sub>4</sub>, filtered and concentrated.

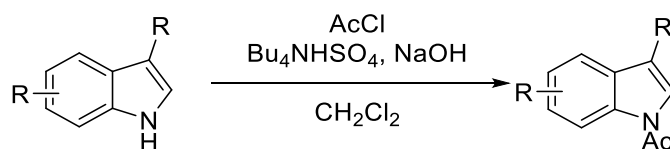

### General procedure D

To a solution of a 3-substituted indole (1 equivalent) in dry dichloromethane (8 mL/mmol of indole) were successively added tetrabutylammonium hydrogen sulfate (0.1 equivalent) and freshly finely powdered sodium hydroxide (5 equivalents). The resulting solution was stirred for 15 minutes and acetyl chloride (3 equivalents) was added dropwise over 15 minutes. The resulting slurry was vigorously stirred for 2 hours and quenched by addition of water. The organic layer was separated and the aqueous layer was extracted twice with dichloromethane. Combined organic layers were washed with brine, dried over MgSO<sub>4</sub>, filtered and concentrated. Flash column chromatography purification using eluent as stated below led to 1-Acetyl-3-substituted indole.

### 1-Acetyl-3-cyclohexylindole (1f)

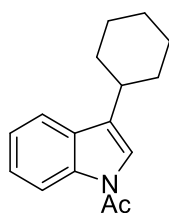

**1f** was prepared from indole (800 mg, 6.83 mmol) and cyclohexanone following **General Procedure C** then acetylated following **General Procedure D**. Flash column chromatography purification (Cyclohexane/EtOAc : 95/5) led to **1f** as a green solid (950 mg, 3.93 mmol, 58% over 2 steps).

### Data for 1f

**R<sub>f</sub>** : 0.28 (Cyclohexane/EtOAc: 9/1); **<sup>1</sup>H NMR (300 MHz, CDCl<sub>3</sub>) δ (ppm)**: 8.44 (d, *J* = 8.2 Hz, 1H), 7.60 – 7.57 (m, 1H), 7.34 (ddd, *J* = 8.2, 7.2, 1.2 Hz, 1H), 7.27 (td, *J* = 7.2, 1.2 Hz, 1H), 7.13 (br s, 1H), 2.83 – 2.73 (m, 1H), 2.61 (s, 3H), 2.14 – 2.06 (m, 2H), 1.92 – 1.78 (m, 3H), 1.51 – 1.41 (m, 4H), 1.37 – 1.27 (m, 1H); **<sup>13</sup>C NMR (75.5 MHz, CDCl<sub>3</sub>) δ (ppm)**: 168.6, 136.2, 130.3, 129.3, 125.1, 123.3, 120.2, 119.4, 116.9, 35.2, 33.4 (2C), 26.8 (2C),

26.5, 24.2; **IR (NaCl),  $\nu$  (cm<sup>-1</sup>):** 3049, 2925, 2851, 1701, 1604, 1451, 1383, 1332, 1243, 1214, 933, 746; **HRMS (ESI<sup>+</sup>):** calculated: 264.1359 ([C<sub>16</sub>H<sub>19</sub>NNaO]<sup>+</sup>;[M+Na]<sup>+</sup>); found: 264.1355

**1-Acetyl-3-(pentan-3-yl)indole (1j)**

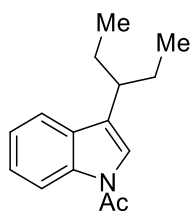

**1j** was prepared from indole (800 mg, 6.83 mmol) and 3-pentanone following *General Procedure C* then acetylated following *General Procedure D*. Flash column chromatography purification (Cyclohexane/EtOAc: 95/5) led to **1j** as a colorless oil (460 mg, 2.00 mmol, 30% over 2 steps).

**Data for 1j**

**R<sub>f</sub>** : 0.31 (Cyclohexane/EtOAc : 9/1); **<sup>1</sup>H NMR (250 MHz, CDCl<sub>3</sub>)  $\delta$  (ppm)** : 8.45 (d,  $J$  = 8.2 Hz, 1H), 7.60 – 7.55 (m, 1H), 7.34 (ddd,  $J$  = 8.2, 7.1, 1.3 Hz, 1H), 7.29 – 7.23 (m, 1H), 7.14 (br s, 1H), 2.72 – 2.62 (m, 1H), 2.63 (s, 3H), 1.82 – 1.69 (m, 4H), 0.87 (t,  $J$  = 7.4 Hz, 6H); **<sup>13</sup>C NMR (75.5 MHz, CDCl<sub>3</sub>)  $\delta$  (ppm)**: 168.5, 136.4, 130.7, 126.6, 125.1, 123.3, 121.7, 119.7, 116.8, 40.2, 27.6 (2C), 24.3, 12.2 (2C); **IR (NaCl),  $\nu$  (cm<sup>-1</sup>):** 3050, 2961, 2929, 2872, 1702, 1604, 1450, 1387, 1329, 1215, 999, 747; **HRMS (ESI<sup>+</sup>):** calculated: 252.1359 ([C<sub>15</sub>H<sub>19</sub>NNaO]<sup>+</sup>; [M+Na]<sup>+</sup>); found: 252.1353

**1-Acetyl-3,6-dimethylindole (1p)**

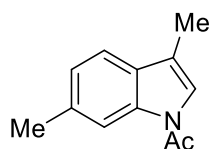

**1p** was prepared from commercially available 6-Methyl-1H-indole (1.08 g, 8.25 mmol) following *General Procedure A* for the formylation. The crude aldehyde was reduced following *General Procedure B*. The crude indole was acetylated following *General Procedure D*. Flash column chromatography purification (Cyclohexane/EtOAc: 95/5 to 9/1) led to **1p** as a black solid (940 mg, 5.02 mmol, 61% over 3 steps).

**Data for 1p**

**R<sub>f</sub>**: 0.38 (Cyclohexane/EtOAc: 9/1); **<sup>1</sup>H NMR (360 MHz, CDCl<sub>3</sub>)  $\delta$  (ppm)**: 8.26 (br s, 1H), 7.37 (d,  $J$  = 8.0 Hz, 1H), 7.14 (br s, 1H), 7.10 (m, 1H), 2.58 (s, 3H), 2.50 (s, 3H), 2.26 (d,  $J$  = 1.3 Hz, 3H); **<sup>13</sup>C NMR (90.5 MHz, CDCl<sub>3</sub>)  $\delta$  (ppm)**: 168.4, 136.4, 135.4, 129.4, 124.9, 121.8, 118.5, 118.4, 117.0, 24.1, 22.0, 9.8; **IR (NaCl),  $\nu$  (cm<sup>-1</sup>):** 3107, 2916, 1694, 1429, 1394, 1346, 1262, 1223, 1208, 1027, 812, 666; **HRMS (ESI<sup>+</sup>):** calculated: 210.0889 ([C<sub>12</sub>H<sub>13</sub>NNaO]<sup>+</sup>; [M+Na]<sup>+</sup>); found: 210.0890

**1-Acetyl-3-methyl-6-bromoindole (1s)**

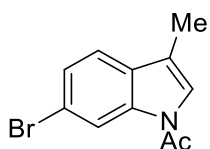

**1s** was prepared from commercially available 6-Bromo-1*H*-indole-3-carboxaldehyde (1.0 g, 4.46 mmol) following **General Procedure B** at room temperature instead of 70 °C. The crude indole was acetylated following **General Procedure D** using 5 equivalents of AcCl and 8.0 equivalents of NaOH. Flash column chromatography purification (Cyclohexane/EtOAc: 9/1) led to **1s** as an orange solid (227.4 mg, 0.902 mmol, 20% over 2 steps).

**Data for 1s**

**R<sub>f</sub>**: 0.5 (Petroleum ether/EtOAc 8:2); **<sup>1</sup>H NMR (300 MHz, CDCl<sub>3</sub>) δ (ppm)**: 8.61 (s, 1H), 7.41 – 7.28 (m, 2H), 7.12 (s, 1H), 2.57 (s, 3H), 2.25 (s, 3H); **<sup>13</sup>C NMR (62.9 MHz, CDCl<sub>3</sub>) δ (ppm)**: 168.2, 136.3, 130.2, 126.5, 122.7, 119.9, 119.6, 118.8, 118.1, 23.8, 9.6; **IR (neat) ν<sub>max</sub> (cm<sup>-1</sup>)**: 1703, 1459, 1430, 1394, 874, 652; **HRMS (ESI<sup>+</sup>)**: calculated: 273.9837, ([C<sub>11</sub>H<sub>10</sub>BrNNaO]<sup>+</sup>; [M+Na]<sup>+</sup>); found: 273.9838

## II.3 Promotor loading and kinetic studies

**Promotor loading:** The yields of SI I.1 were obtained using **general procedure E** from **1a**, **2a** (2 equivalents) in 0.5M CH<sub>2</sub>Cl<sub>2</sub> for 2.5 hours with various amounts of FeCl<sub>3</sub>.

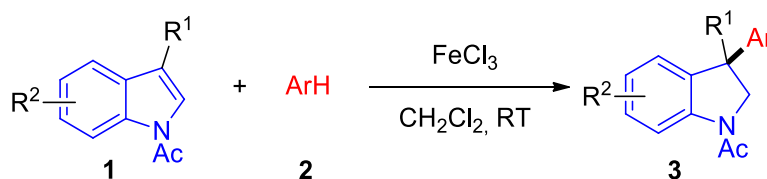

### General Procedure E

To a solution of the 3-substituted *N*-acetyl indole derivative **1** in CH<sub>2</sub>Cl<sub>2</sub>, was successively added electron-rich arene **2** and FeCl<sub>3</sub> in one portion. After completion of the reaction (checked by TLC) the reaction was quenched with a saturated NaCl aqueous solution and diluted with EtOAc. The phases were separated. The aqueous phase was then extracted twice with EtOAc. The combined organic phases were then dried over Na<sub>2</sub>SO<sub>4</sub>, filtered and concentrated under vacuum. The crude oil was then purified by flash column chromatography.

**Kinetic study:** The influence of the concentration of each component of the reaction on the reaction kinetic of SI I.2 were obtained as follow.

**Typical procedure:** To a solution of *N*-Ac skatole **1a** in 10 mL of CH<sub>2</sub>Cl<sub>2</sub>, was successively added anisole **2b**, *p*-methyl-*N*-Ms aniline (0.5 mmol) as internal standard and FeCl<sub>3</sub> in one portion. Aliquot of 100 µL were taken by syringe at regular times and filtered immediately through a short pad of silica gel with EtOAc. After evaporation, each aliquot were injected in HPLC (silica column, eluent: hexane/ EtOH: 98/2, 1 mL/min).

### Representative chromatogram

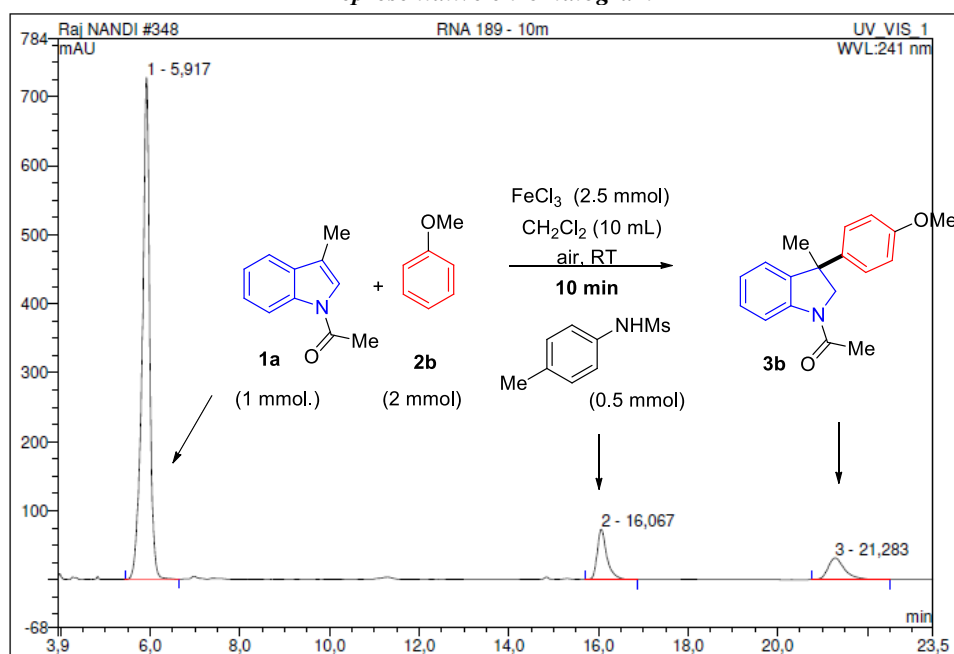

| No.           | Ret.Time<br>min | Peak Name | Height<br>mAU | Area<br>mAU*min | Rel.Area<br>% | Amount | Type |
|---------------|-----------------|-----------|---------------|-----------------|---------------|--------|------|
| 1             | 5,92            | n.a.      | 727,240       | 140,465         | 81,55         | n.a.   | BMB  |
| 2             | 16,07           | n.a.      | 72,655        | 18,147          | 10,54         | n.a.   | BMB  |
| 3             | 21,28           | n.a.      | 31,411        | 13,636          | 7,92          | n.a.   | BMB  |
| <b>Total:</b> |                 |           | 831,306       | 172,248         | 100,00        | 0,000  |      |

The calibration curve between **3b** and *p*-methyl-N-Ms aniline allowed us to calculate the concentration of **3b**.

*Calibration curve*

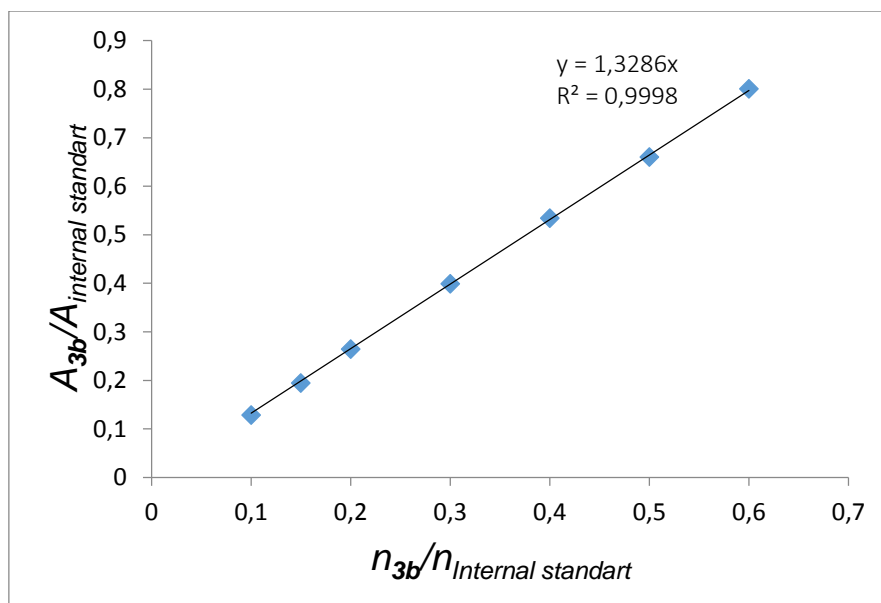

Rate constants were calculated for each reaction using the initial rates method.

*Representative initial rates data*

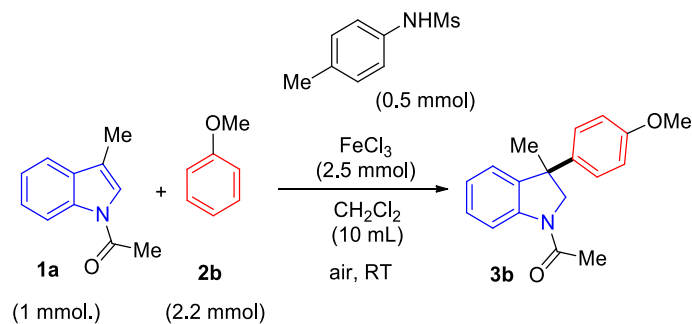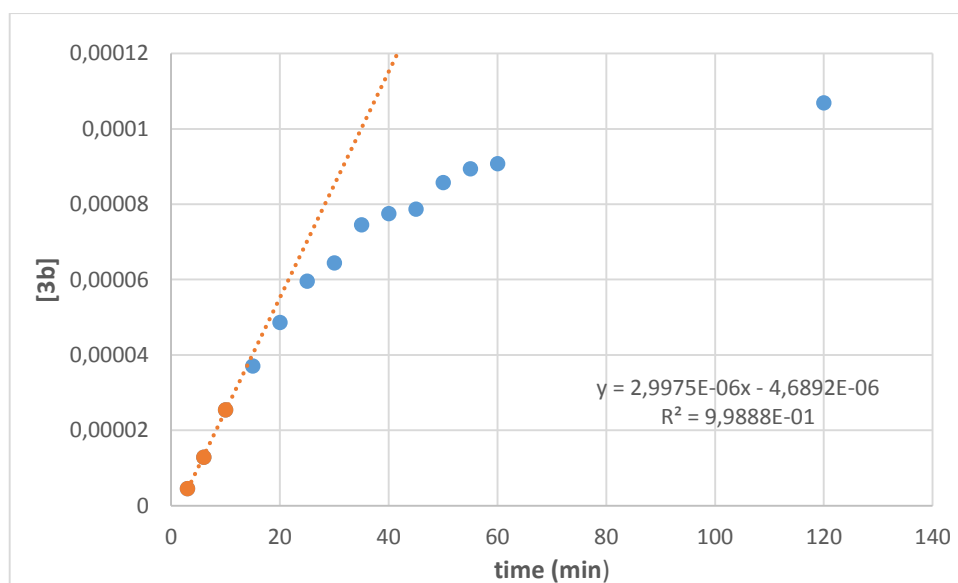

The plot between the initial rate constant versus the concentration of  $\text{FeCl}_3$  was then drawn.



## II.4 In-situ IR monitoring

**Reaction setup:** React IR 15 with MCT Detector using HappGenzel apodization was used to collect IR reaction spectra. The instrument was fitted with a DiComp (Diamond) probe connected via AgX 6mm x 1.5m silver halide fiber. All data were collected at  $8\text{ cm}^{-1}$  resolution from  $2500$  to  $650\text{ cm}^{-1}$ . 125 scans were collected to obtain 1 spectrum. An air background was collected prior to the experiments and Mettler Toledo iCIR version 4.3 was used for instrument control and data analysis. Baseline offset correction was applied.

### IR monitoring of the reaction between N-Ac skatole and $\text{FeCl}_3$ in $\text{CH}_2\text{Cl}_2$ (0.2 M):

#### *Procedure:*

Under nitrogen atmosphere,  $\text{CH}_2\text{Cl}_2$  (2.0 mL) was introduced into a three-necked round-flask equipped with the DiComp probe. N-Ac skatole (69 mg, 0.4 mmol) was introduced. After stabilization of the system,  $\text{FeCl}_3$  was added in 3 successive portions: 1) 33 mg, 0.2 mmol, 2) 33 mg, 0.2 mmol, 0.2 mmol and 3) 33 mg, 0.2 mmol, 0.2 mmol. Evolution of the system was monitored at 1 min intervals and the subsequent portion was introduced when no further evolution was noted.

#### *Selected IR spectra [ $1770\text{--}1380\text{ cm}^{-1}$ ]:*

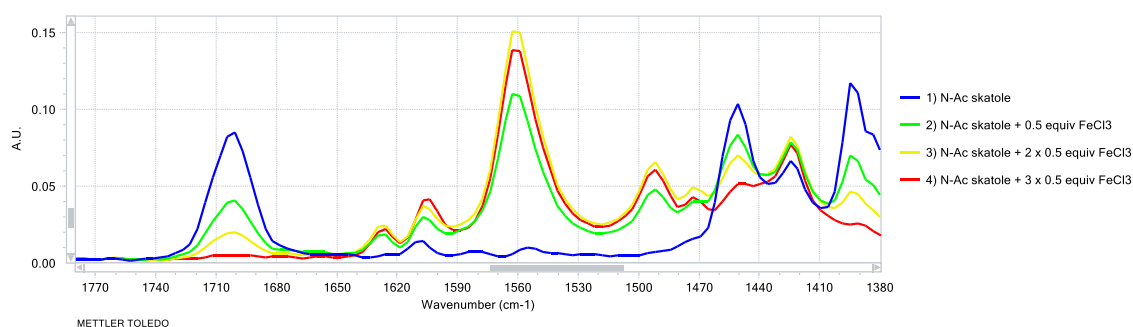

### IR monitoring of the reaction between N-Ac skatole and anisole (2.0 equiv) in the presence of $\text{FeCl}_3$ (2.0 equiv) in $\text{CH}_2\text{Cl}_2$ (0.2 M)

#### *Procedure:*

Under nitrogen atmosphere,  $\text{CH}_2\text{Cl}_2$  (2.0 mL) was introduced into a three-necked round-flask equipped with the DiComp probe. N-Ac skatole (69 mg, 0.4 mmol) followed by anisole (87  $\mu\text{L}$ , 0.8 mmol) was introduced. After stabilization of the system,  $\text{FeCl}_3$  (130 mg, 0.8 mmol) was added at once. The end of the addition was taken as reference time ( $t = 0$ ).

#### *Selected IR spectra [ $1800\text{--}1400\text{ cm}^{-1}$ ] region*

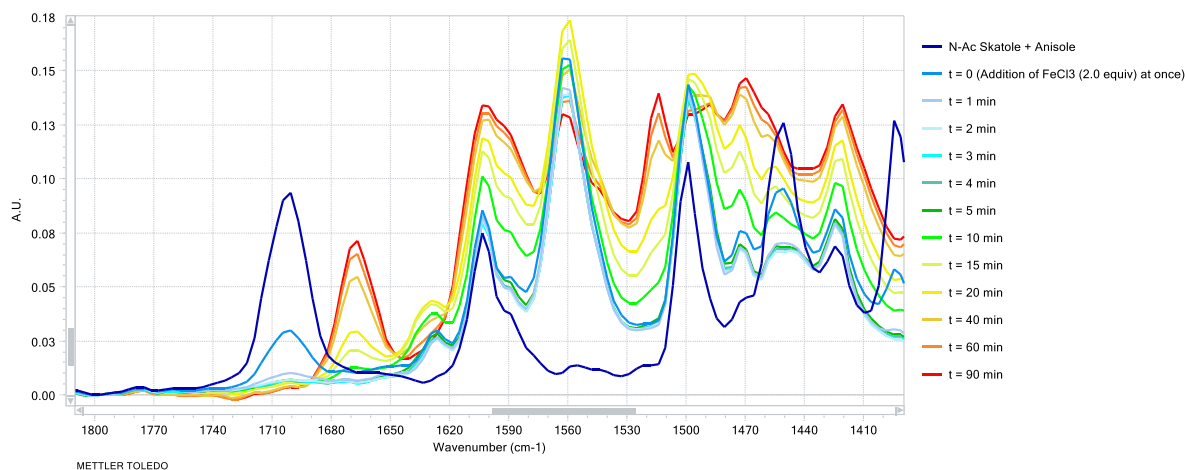

**Reference Spectra [1800–1400  $\text{cm}^{-1}$ ] region (0.2 M solutions in  $\text{CH}_2\text{Cl}_2$ )**

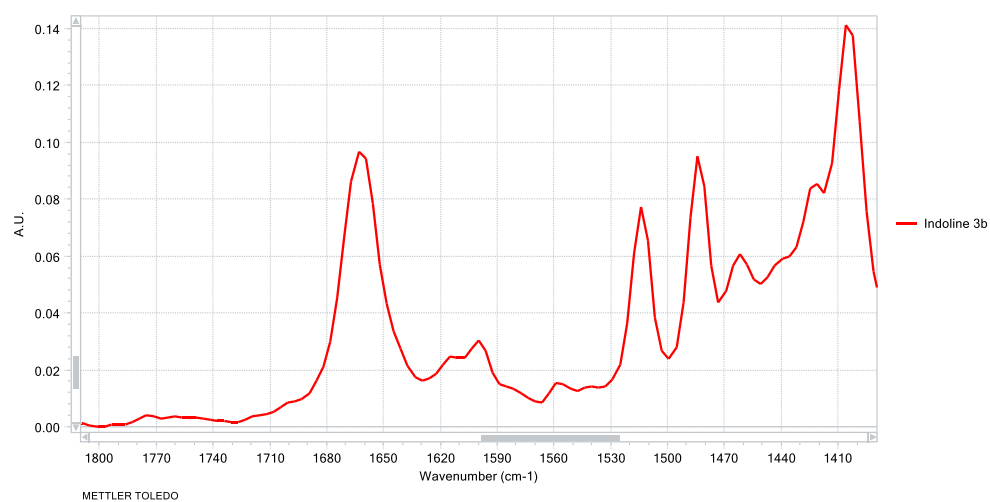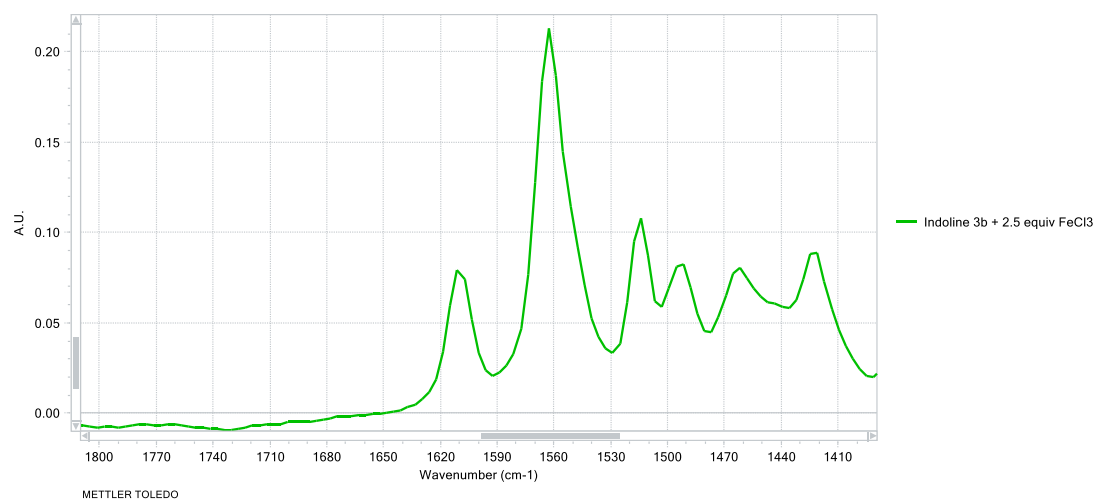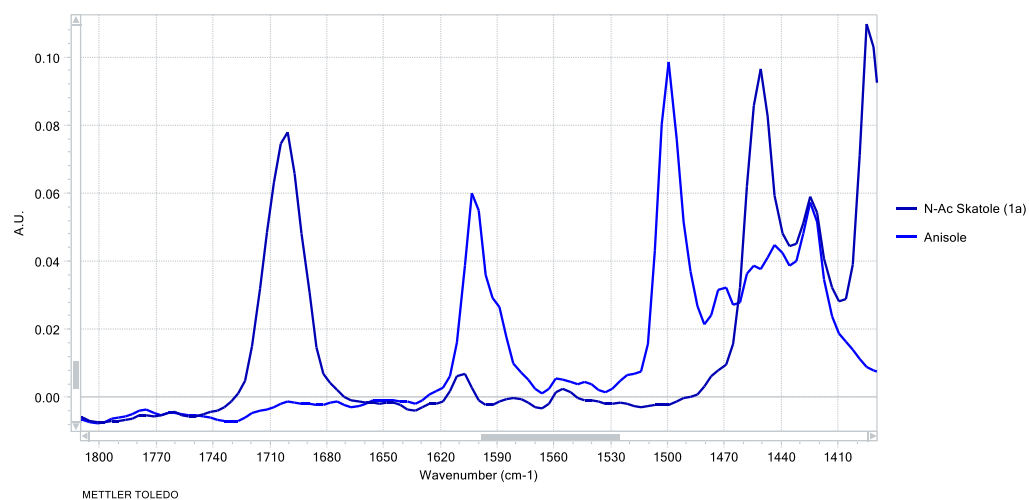

## II.5 Hammett study at the C<sub>5</sub>- and C<sub>6</sub>-positions

The Hammett study was conducted through competitive experiments involving two N-Ac skatole derivatives **1** as follows:

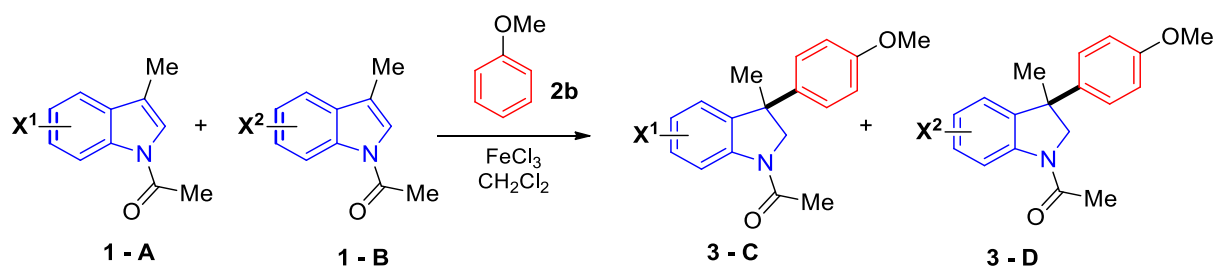

### Typical procedure

To a solution of 5- or 6-substituted N-Ac indole derivatives **1 - A** (0.173 mmol) and **1 - B** (0.173 mmol) in CH<sub>2</sub>Cl<sub>2</sub> (1.7 mL), was successively added anisole **2b** (0.693 mmol) and FeCl<sub>3</sub> (0.832 mmol) in one portion. The reaction was stirred until it reaches a 10-20% conversion. The reaction was quenched with a saturated NaCl aqueous solution and was then diluted with EtOAc. The phases were separated. The aqueous phase was then extracted twice with EtOAc. The combined organic phases were then dried over Na<sub>2</sub>SO<sub>4</sub>, filtered and concentrated under vacuum. The mixture of **3 - C** and **3 - D** were then separated from **1 - A** and **1 - B** by flash column chromatography.

The ratio of the two hydroarylated compounds **3 - C** and **3 - D** was determined by relative integration by <sup>1</sup>H NMR in order to obtain the k<sub>X</sub>/k<sub>H</sub> ratio.

k<sub>H</sub> = rate constant of the reaction with anisole and N-Ac skatole **1a** (X = H).

k<sub>X</sub> = rate constant of the reaction with anisole and a 5 or 6 substituted N-Ac skatole **1** (X ≠ H).

### *Product ratio obtained from competing experiments*

| X <sup>1</sup>       | X <sup>2</sup>    | Ratio C/D |
|----------------------|-------------------|-----------|
| 5-OMe                | H                 | 1.14      |
| 5-Me                 | H                 | 1.876     |
| 5-Br                 | H                 | 0.13      |
| 5-CO <sub>2</sub> Et | 5-Br              | 0.526     |
| 5-CN                 | 5-Br              | 0.357     |
| 5-NO <sub>2</sub>    | 5-CN              | 0.344     |
| 6-Me                 | H                 | 1.63      |
| 6-F                  | H                 | 1.505     |
| 6-Br                 | H                 | 0.446     |
| 6-Cl                 | 6-Br              | 1.447     |
| 6-NO <sub>2</sub>    | 5-NO <sub>2</sub> | 0.125     |

The integration ratio of **3** (X ≠ H) / **3a** (X = H) was equal to k<sub>X</sub>/k<sub>H</sub> and log(k<sub>X</sub>/k<sub>H</sub>) was then determined. Hammett σ<sub>p</sub> values were obtained from Taft and co-workers.<sup>17</sup>

<sup>17</sup> Hansch, C.; Leo, A.; Taft, R. W. *Chem. Rev.* **1991**, 91, 165.

*Hammett relationship from 5- and 6-substituted N-Ac skatole*

| Substituent               | $\sigma_p$ | $k_x/k_H$ | $\log(k_x/k_H)$ |
|---------------------------|------------|-----------|-----------------|
| <b>5-OMe</b>              | -0,27      | 1.14      | 0,0569          |
| <b>5-Me</b>               | -0,15      | 1.876     | 0,273           |
| <b>5-H</b>                | 0          | 1         | 0               |
| <b>5-Br</b>               | 0,23       | 0.13      | -0,886          |
| <b>5-CO<sub>2</sub>Et</b> | 0,45       | 0.0684    | -1,163          |
| <b>5-CN</b>               | 0,66       | 0.0464    | -1,333          |
| <b>5-NO<sub>2</sub></b>   | 0,78       | 0.0244    | -1,6126         |
| <b>6-Me</b>               | -0,15      | 1.63      | 0,212           |
| <b>6-H</b>                | 0          | 1         | 0               |
| <b>6-F</b>                | 0,06       | 1.505     | 0,177           |
| <b>6-Cl</b>               | 0,23       | 0.646     | -0,189          |
| <b>6-Br</b>               | 0,23       | 0.446     | -0,35           |
| <b>6-NO<sub>2</sub></b>   | 0,78       | 0.00305   | -2,51           |

## II.6 Influence of the C3-substituent

### N-Acetyl-2-(2-methoxy-5-methylphenyl)-3-cyclohexylindoline (8aa)

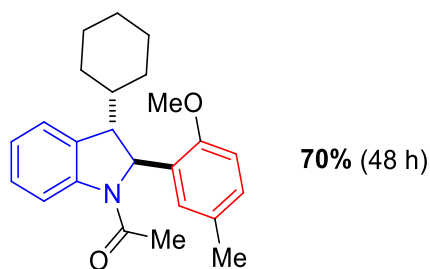

**8aa** was prepared from 1-Acetyl-3-cyclohexylindole **1f** (80 mg, 0.330 mmol) following *General Procedure E* using 4-methylanisole **2a** as electron-rich arene (89 mg, 0.729 mmol) and FeCl<sub>3</sub> (130 mg, 0.796 mmol) in 0.5 mL of CH<sub>2</sub>Cl<sub>2</sub>. Flash column chromatography purification (Cyclohexane/EtOAc: 9/1 to 8/2) led to **8aa** as colorless solid (84 mg, 0.231 mmol, 70%).

The *trans* stereochemistry was assigned based on the small coupling constant between the protons at the 2 and 3 positions of the N-Ac indoline.<sup>19</sup>

#### Data for 8aa

**R<sub>f</sub>**: 0.35 (Cyclohexane/EtOAc: 8/2); **<sup>1</sup>H NMR (250 MHz, CDCl<sub>3</sub>) δ (ppm)**: 8.33 (d, *J* = 8.0 Hz, 1H), 7.32 – 7.25 (m, 1H), 7.11 – 6.98 (m, 3H), 6.79 (d, *J* = 8.2 Hz, 1H), 6.62 (d, *J* = 1.4 Hz, 1H), 5.44 (br s, 1H), 3.87 (s, 3H), 2.88 (d, *J* = 3.3 Hz, 1H), 2.11 (s, 3H), 2.04 (s, 3H), 1.78 – 1.59 (m, 6H), 1.29 – 1.08 (m, 5H); **<sup>13</sup>C NMR (62.9 MHz, CDCl<sub>3</sub>) δ (ppm)**: 169.3, 153.5, 143.6, 132.7, 130.4, 130.3, 128.9, 127.9, 125.8, 125.7, 123.6, 116.8, 110.4, 62.2, 56.0, 55.3, 44.4, 29.8, 29.3, 26.7, 26.6, 26.5, 23.8, 20.7; **IR (NaCl), ν (cm<sup>-1</sup>)**: 2925, 2851, 1663, 1597, 1499, 1479, 1461, 1396, 1246, 1112, 1031, 756; **HRMS (ESI<sup>+</sup>)**: calculated: 386.2091 ([C<sub>24</sub>H<sub>29</sub>NNaO<sub>2</sub>]<sup>+</sup>; [M+Na]<sup>+</sup>); found: 386.2075.

### N-Acetyl-2-(2-methoxy-5-methylphenyl)-3-(pentan-3-yl)indoline (8ab)

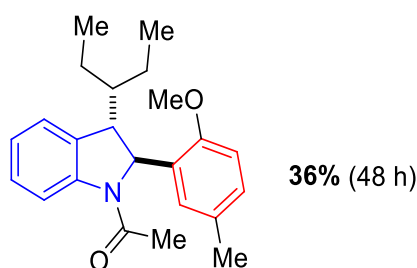

**8ab** was prepared from 1-Acetyl-3-(pentan-3-yl)indole **1j** (80 mg, 0.348 mmol) following *General Procedure E* using 4-methylanisole **2a** as electron-rich arene (94 mg, 0.767 mmol) and FeCl<sub>3</sub> (135 mg, 0.837 mmol) in 0.5 mL of CH<sub>2</sub>Cl<sub>2</sub>. Flash column chromatography purification (Cyclohexane/EtOAc: 9/1 to 8/2) led to **8ab** as colorless oil (44 mg, 0.125 mmol, 36%).

The *trans* stereochemistry was assigned based on the small coupling constant between the protons at the 2 and 3 positions of the N-Ac indoline.<sup>19</sup>

#### Data for 8ab

**Rf:** 0.33 (Cyclohexane/EtOAc: 8/2); **<sup>1</sup>H NMR (250 MHz, CDCl<sub>3</sub>) δ (ppm):** 8.33 (d, *J* = 8.1 Hz, 1H), 7.31 – 7.25 (m, 1H), 7.08 (m, 3H), 6.79 (d, *J* = 8.3 Hz, 1H), 6.66 (d, *J* = 1.6 Hz, 1H), 5.38 (d, *J* = 1.8 Hz, 1H), 3.90 – 3.79 (m, 1H), 3.86 (s, 3H), 3.20 (t<sub>app</sub>, *J* = 2.6 Hz, 1H), 2.13 (s, 3H), 2.01 (s, 3H), 1.60 – 1.43 (m, 2H), 1.35 – 1.22 (m, 2H), 0.88 (t, *J* = 7.3 Hz, 6H); **<sup>13</sup>C NMR (62.9 MHz, CDCl<sub>3</sub>) δ (ppm):** 169.5, 153.4, 144.1, 133.1, 130.9, 130.5, 128.9, 127.9, 125.9, 125.2, 123.9, 116.9, 110.3, 61.8, 55.3, 52.1, 48.4, 23.9, 23.0, 22.3, 20.8, 12.4, 12.2; **IR (NaCl), ν (cm<sup>-1</sup>):** 2960, 2931, 2873, 1664, 1596, 1499, 1479, 1460, 1395, 1246, 1031, 754; **HRMS (ESI<sup>+</sup>):** calculated: 374.2091 ([C<sub>23</sub>H<sub>29</sub>NNaO<sub>2</sub>]<sup>+</sup>; [M+Na]<sup>+</sup>); found: 374.2072.

#### N-Acetyl-3-(4-methoxyphenyl)-3-cyclohexylindoline (3ad)

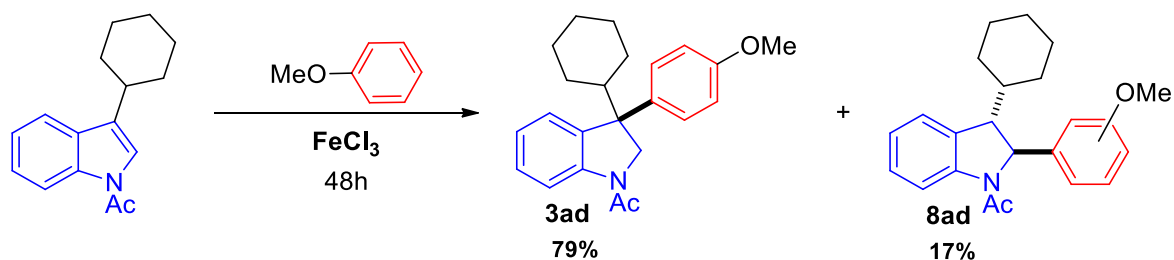

**3ad** was prepared from 1-Acetyl-3-cyclohexylindoline **1f** (62.7 mg, 0.260 mmol) following *General Procedure E* using anisole **2b** (87 mg, 0.785 mmol) as electron-rich arene and  $\text{FeCl}_3$  (101.6 mg, 0.626 mmol) in 0.5 mL of  $\text{CH}_2\text{Cl}_2$ . Flash column chromatography purification (Cyclohexane/EtOAc: 8/2) led to **3ad** as a pale brown oil (72.5 mg, 0.207 mmol, 79%) along with **8ad** (16.1 mg, 0.046 mmol, 17%) as an inseparable mixture of *ortho/para* regioisomers.

#### Data for 3ad

**Rf:** 0.17 (Cyclohexane/EtOAc: 8/2); **<sup>1</sup>H NMR (250 MHz, CDCl<sub>3</sub>) δ (ppm):** 8.29 (d, *J* = 8.2 Hz, 1H), 7.28 – 7.22 (m, 3H), 7.18 – 7.14 (m, 1H), 7.05 (td, *J* = 7.3, 0.9 Hz, 1H), 6.85 (d, *J* = 8.9 Hz, 2H), 4.18 (d, *J* = 10.8 Hz, 1H), 4.04 (d, *J* = 10.8 Hz, 1H), 3.77 (s, 3H), 2.22 (s, 3H), 1.74 – 1.51 (m, 6H), 1.31 – 1.15 (m, 2H), 1.14 – 0.99 (m, 2H), 0.69 – 0.60 (m, 1H); **<sup>13</sup>C NMR (62.9 MHz, CDCl<sub>3</sub>) δ (ppm):** 168.2, 158.0, 143.5, 137.6, 134.7, 128.0, 127.6 (2C), 126.0, 123.2, 117.0, 114.0 (2C), 61.9, 55.3, 55.1, 47.1, 28.1, 27.9, 26.8, 26.8, 26.4, 24.5; **IR (NaCl), ν (cm<sup>-1</sup>):** 3039, 3001, 2930, 2852, 1662, 1609, 1595, 1512, 1482, 1401, 1251, 757; **HRMS (ESI<sup>+</sup>):** calculated: 350.2115 ([C<sub>23</sub>H<sub>28</sub>NO<sub>2</sub>]<sup>+</sup>; [M+H]<sup>+</sup>); found: 350.2100.

#### N-Acetyl-3-(4-methoxyphenyl)-3-(pentan-3-yl)indoline (3ae)

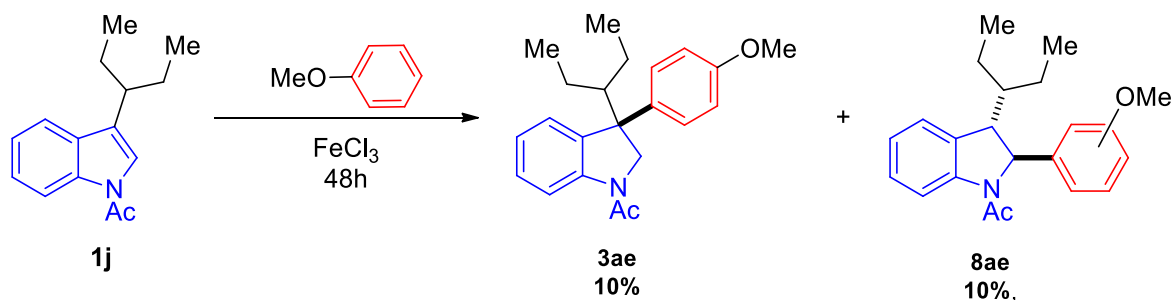

**3ae** was prepared from 1-Acetyl-3-(pentan-3-yl)indole **1j** (60.0 mg, 0.261 mmol) using anisole **2b** (87 mg, 0.785 mmol) as electron-rich arene and FeCl<sub>3</sub> (101.6 mg, 0.626 mmol) in 0.5 mL of CH<sub>2</sub>Cl<sub>2</sub> following **General Procedure E**. Preparative TLC purification (Petroleum ether/EtOAc: 8/2) led to **3ae** as a gummy oil (9.0 mg, 0.0267 mmol, 10%) along with **8ae** (9.0 mg, 0.0267 mmol, 10%) as an inseparable mixture of *ortho/para* regioisomers

Data for **3ae**

**Rf**: 0.37 (Petroleum ether/EtOAc: 8/2); **<sup>1</sup>H NMR (300 MHz, CDCl<sub>3</sub>) δ (ppm)**: 8.28 (d, *J* = 7.8 Hz, 1H), 7.29 – 7.15 (m, 4H), 7.04 (t, *J* = 7.5 Hz, 1H), 6.89 (d, *J* = 9.0 Hz, 2H), 4.17 (s, 2H), 3.78 (s, 3H), 2.26 (s, 3H), 2.14 – 2.07 (m, 1H), 1.56 – 1.41 (m, 2H), 1.29 – 1.18 (m, 1H), 1.12 – 1.02 (m, 1H), 0.95 – 0.87 (m, 6H); **<sup>13</sup>C NMR (75 MHz, CDCl<sub>3</sub>) δ (ppm)**: 168.4, 158.1, 143.1, 138.8, 136.3, 128.1, 127.3 (2C), 125.1, 123.6, 117.2, 114.1 (2C), 60.9, 56.3, 55.3, 49.6, 25.0, 24.7, 24.6, 15.0, 13.6; **IR (NaCl), ν (cm<sup>-1</sup>)**: 2961, 1665, 1510, 1399, 1252, 666.; **HRMS (ESI<sup>+</sup>)**: calculated: 360.1934 ([C<sub>22</sub>H<sub>27</sub>NNaO<sub>2</sub>]<sup>+</sup>; [M+Na]<sup>+</sup>); found: 360.1928

**N-Acetyl-2-((2/4)-methoxyphenyl)-3-(pentan-3-yl)indoline (8ae)**

Data for **8ae**

**Rf**: 0.52 (Petroleum ether/EtOAc: 8/2); **<sup>1</sup>H NMR (360 MHz, CDCl<sub>3</sub>) δ (ppm)**: 8.33 (d, *J* = 7.9 Hz, 1H), 8.32 (d, *J* = 7.9 Hz, 1H), 7.32 – 7.21 (m, 3H), 7.12 – 7.01 (m, 6H), 6.92 – 6.79 (m, 5H), 5.42 (d, *J* = 1.8 Hz, 1H, C2 H of *ortho* isomer), 4.97 (d, *J* = 1.8 Hz, 1H, C2 H of *para* isomer), 3.91 (s, 3H), 3.78 (s, 3H), 3.26 (s, 1H), 3.20 (s, 2H), 2.04 (s, 3H), 2.01 (s, 3H), 1.54 – 1.24 (m, 10H), 0.92 – 0.82 (m, 12H); **<sup>13</sup>C NMR (90 MHz, CDCl<sub>3</sub>) δ (ppm)**: 168.3, 155.5, 143.9, 135.5, 132.9, 130.9, 128.5, 127.9, 127.8, 126.0, 125.3, 125.1, 124.9, 123.9, 123.8, 121.1, 116.8, 116.7, 114.4, 110.2, 66.0, 61.7, 55.2, 55.0, 53.3, 51.8, 48.2, 47.9, 29.7, 24.1, 23.7, 23.3, 22.7, 22.1, 21.9, 12.3, 12.2, 12.1, 12.0; **IR (NaCl), ν (cm<sup>-1</sup>)**: 2960, 1664, 1512, 1479, 1461, 1248, 1030, 753; **HRMS (ESI<sup>+</sup>)**: calculated: 360.1934 ([C<sub>22</sub>H<sub>27</sub>NNaO<sub>2</sub>]<sup>+</sup>; [M+Na]<sup>+</sup>); found: 360.1936

**N-Acetyl-3-(4-methoxyphenyl)-3-phenylindoline (3af)**

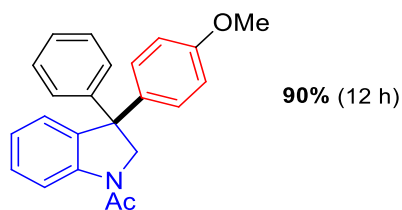

We reported the synthesis of **3af** with FeCl<sub>3</sub> with **General Procedure E** in ref **15**.

See ref **15** for full characterization of **3af**.

## II.7 Taft study at C<sub>3</sub> position

The goal is to determine the Taft equation which take into account the steric and electronic factors of the substituent at the C<sub>3</sub>-position of the indole nucleus.

$$\log(k_R/k_{Me}) = \rho^*\sigma^* + \delta E_s$$

$k_R$  = rate constant of the reaction with anisole and 3-substituted N-Ac indole **1** ( $R \neq Me$ ).

$k_{Me}$  = rate constant of the reaction with anisole and N-Ac skatole **1a** ( $R = Me$ ).

$\sigma^*$  and  $E_s$  are respectively the Taft's polar and steric substituent parameters.

$\rho^*$  and  $\delta$  are respectively the polar and steric constants

The Taft study was undertaken through competitive experiments involving two 3-substituted N-Ac indoles derivatives **1** as follows:

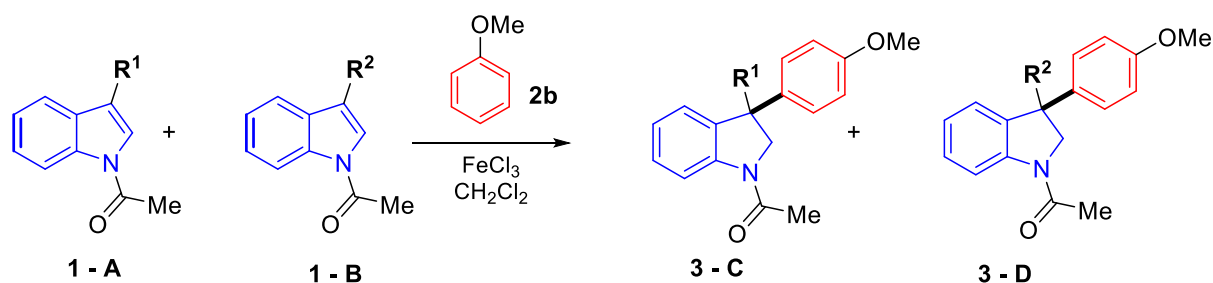

### Typical procedure

To a solution of 3-substituted N-Ac indole derivatives **1 - A** (0.173 mmol) and **1 - B** (0.173 mmol) in  $CH_2Cl_2$  (1.7 mL), was successively added anisole **2b** (0.693 mmol) and  $FeCl_3$  (0.832 mmol) in one portion. The reaction was stirred until it reaches a 10-20% conversion. The reaction was quenched with a saturated NaCl aqueous solution and was then diluted with EtOAc. The phases were separated. The aqueous phase was then extracted twice with EtOAc. The combined organic phases were then dried over  $Na_2SO_4$ , filtered and concentrated under vacuum. The mixture of **3 - C** and **3 - D** were then separated from **1 - A** and **1 - B** by flash column chromatography.

The ratio of the two hydroarylated compounds **3 - C** and **3 - D** was determined by relative integration by  $^1H$  NMR in order to obtain the  $k_R/k_{Me}$  ratio.

$k_{Me}$  = rate constant of the reaction with anisole and N-Ac skatole **1a** ( $R = Me$ ).

$k_R$  = rate constant of the reaction with anisole and 3-substituted N-Ac indole **1** ( $R \neq Me$ ).

### *Product ratio obtained from competing experiments*

| <b>R<sup>1</sup></b>      | <b>R<sup>2</sup></b>      | <b>Ratio C/D</b> |
|---------------------------|---------------------------|------------------|
| <b>Et</b>                 | Me                        | 1.25             |
| <b><i>n</i>-Bu</b>        | Me                        | 0.555            |
| <b>Bn</b>                 | Me                        | 0.1299           |
| <b><i>cyclo</i>-Hexyl</b> | <b>Bn</b>                 | 0.59             |
| <b><i>iso</i>-Pentyl</b>  | <b><i>cyclo</i>-Hexyl</b> | 0.035            |
| <b>Ph</b>                 | Me                        | 0.01             |



The integration ratio of **3** ( $R \neq \text{Me}$ ) / **3a** ( $R = \text{Me}$ ) was equal to  $k_R/k_{\text{Me}}$  and  $\log(k_R/k_{\text{Me}})$  was then determined.  $\sigma^*$  and  $E_s$  are respectively the Taft's polar<sup>18</sup> and steric substituent<sup>19</sup> parameters.

*Taft relationship from 3-substituted N-Ac indoles with FeCl<sub>3</sub>*

| <b>R</b>                  | <b><math>\sigma^*</math></b> | <b><math>E_s</math></b> | <b><math>k_R/k_{\text{Me}}</math></b> | <b><math>\log(k_R/k_{\text{Me}})</math></b> |
|---------------------------|------------------------------|-------------------------|---------------------------------------|---------------------------------------------|
| <b>Me</b>                 | 0                            | 0                       | 1                                     | 0                                           |
| <b>Et</b>                 | -0,1                         | -0,07                   | 1.25                                  | 0,0969                                      |
| <b><i>n</i>-Bu</b>        | -0,13                        | -0,39                   | 0.555                                 | -0,2557                                     |
| <b>Bn</b>                 | 0,225                        | -0,38                   | 0.1299                                | -0,8864                                     |
| <b><i>cyclo</i>-Hexyl</b> | -0,15                        | -0,79                   | 0.01                                  | -1,1155                                     |
| <b><i>iso</i>-Pentyl</b>  | -0,225                       | -1,98                   | 0.0766                                | -2,57                                       |
| <b>Ph</b>                 | 0,6                          | -2,55                   | 0.00268                               | -2                                          |

The polar ( $\rho^* = 1.05$ ) and steric ( $\delta = 0.84$ ) constants were determined by multiple linear regression.

<sup>18</sup> Obtained from: (a) Taft, R. W. *J. Am. Chem. Soc.* **1953**, 75, 4231-4238; (b) Taft, R.; Kreevoy, M. M. *J. Am. Chem. Soc.* **1957**, 79, 4011-4015;

<sup>19</sup> Obtained from: (a) Taft, R. W. *J. Am. Chem. Soc.* **1952**, 74, 3120-3128; (b) Wang, B.-Y.; Rieth, S.; Badjić, J. *D. J. Am. Chem. Soc.* **2009**, 131, 7250-7252.

## II.8 Deuterated experiments

### Hydroarylation with d8-toluene

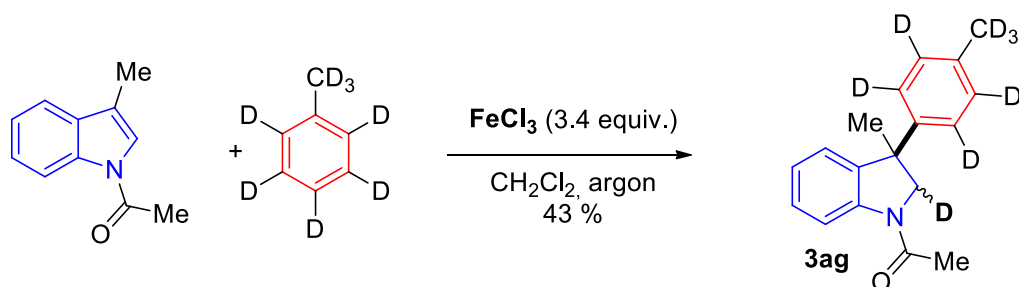

Deuterated **3g** was prepared from 1-Acetyl-3-methylindole **1a** (100.0 mg, 0.578 mmol), d8-toluene (173.6 mg, 1.733 mmol) as electron-rich arene and FeCl<sub>3</sub> (318.0 mg, 1.965 mmol) in 0.7 mL of CH<sub>2</sub>Cl<sub>2</sub> following *general procedure E*. Flash column chromatography purification (Petroleum ether/EtOAc: 8/2) led to **3ag** with almost complete incorporation of deuterium at C2 (68.5 mg, 0.25 mmol, 43%).

***<sup>1</sup>H NMR (CDCl<sub>3</sub>, 300 MHz) of deuterated 3ag***

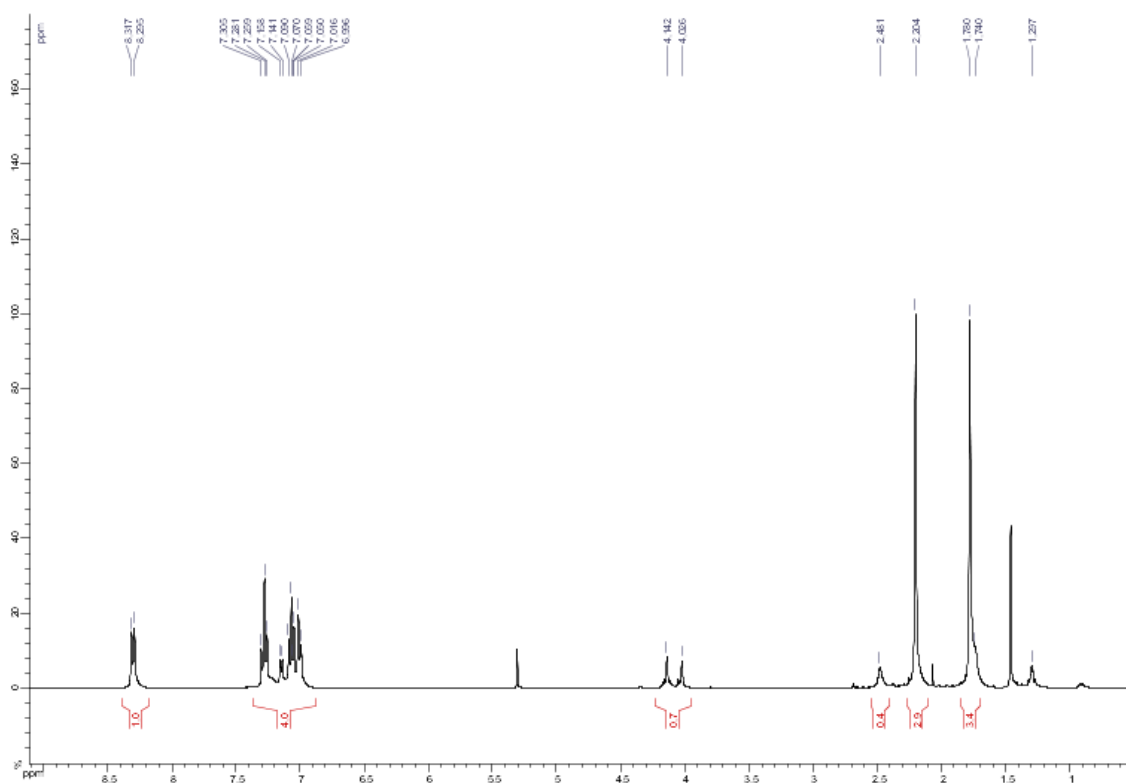

Hydroarylation with D<sub>2</sub>O and FeCl<sub>3</sub>

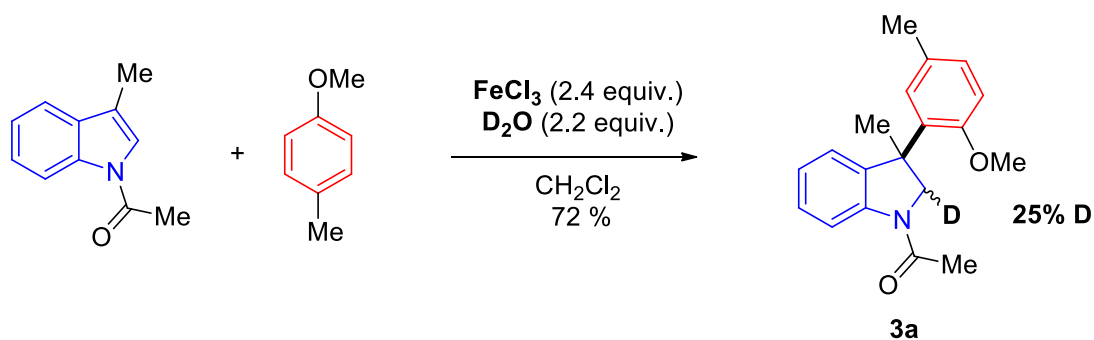

Partially deuterated **3a** was prepared from 1-Acetyl-3-methylindole **1a** (150.0 mg, 0.866 mmol), 4-methylanisole (230.0 mg, 1.88 mmol) as electron-rich arene and FeCl<sub>3</sub> (337.1 mg, 2.08 mmol) with D<sub>2</sub>O (37.6 mg, 1.88 mmol) in 1 mL of CH<sub>2</sub>Cl<sub>2</sub> following *general procedure E*. Flash column chromatography purification (Petroleum ether/EtOAc: 8/2) led to **3a** with 25% incorporation of deuterium at C2 (184 mg, 0.62 mmol, 72%).

*<sup>1</sup>H NMR (CDCl<sub>3</sub>, 300 MHz) of partially deuterated 3a*

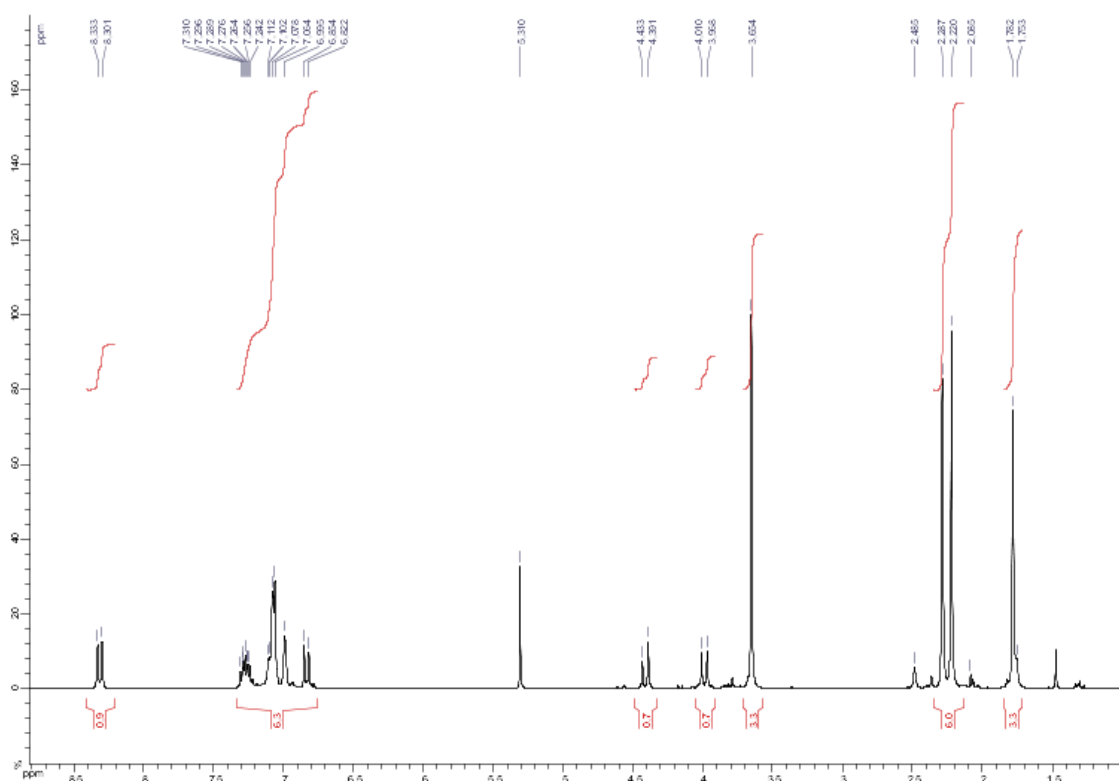

**MS trace (ESI<sup>+</sup>) of partially deuterated 3ae**

**Acquisition Parameter**

|             |            |                       |           |                  |           |
|-------------|------------|-----------------------|-----------|------------------|-----------|
| Source Type | ESI        | Ion Polarity          | Positive  | Set Nebulizer    | 2.8 Bar   |
| Focus       | Not active | Set Capillary         | 4500 V    | Set Dry Heater   | 180 °C    |
| Scan Begin  | 50 m/z     | Set End Plate Offset  | -500 V    | Set Dry Gas      | 9.0 l/min |
| Scan End    | 1000 m/z   | Set Collision Cell RF | 100.0 Vpp | Set Divert Valve | Waste     |

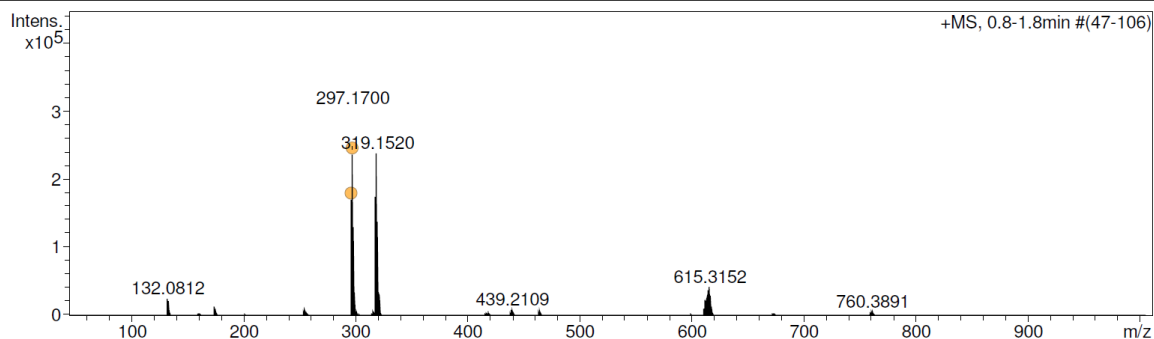

| Meas. m/z  | # | Ion Formula | m/z        | err [mDa] | err [ppm] | mSigma |
|------------|---|-------------|------------|-----------|-----------|--------|
| 296.164353 | 1 | C19H22NO2   | 296.164505 | 0.2       | 0.5       | 571.8  |
| 297.169982 | 1 | C19H21DNO2  | 297.170782 | 0.8       | 2.7       | 208.7  |

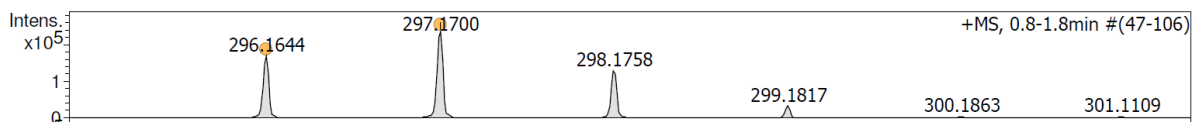

### III. DFT Coordinates (x,y,z) of the M06-2X computed intermediates

| A1<br>E(RM062X) = -2369.49716354 |              |              |              | TS <sub>A1B1</sub><br>E(RM062X) = -2369.49098694<br>Frequency -209.0056 |              |              |              |
|----------------------------------|--------------|--------------|--------------|-------------------------------------------------------------------------|--------------|--------------|--------------|
| C                                | -2.591679000 | -0.655649000 | -1.605887000 | C                                                                       | -2.682178000 | -0.440662000 | -1.281457000 |
| C                                | -2.821342000 | 0.781566000  | 0.878603000  | C                                                                       | -2.659987000 | 0.652202000  | 0.537624000  |
| C                                | -4.295957000 | 0.616981000  | 0.910330000  | C                                                                       | -4.141581000 | 0.748550000  | 0.781897000  |
| H                                | -4.374796000 | -1.453830000 | 1.569489000  | H                                                                       | -4.482469000 | -1.194532000 | 1.677890000  |
| H                                | -4.596664000 | 1.055653000  | 1.876993000  | H                                                                       | -4.225690000 | 1.296400000  | 1.732008000  |
| H                                | -4.746656000 | 1.254294000  | 0.142596000  | H                                                                       | -4.591451000 | 1.394898000  | 0.020990000  |
| C                                | -4.866489000 | -0.810324000 | 0.829136000  | C                                                                       | -4.906065000 | -0.567836000 | 0.883545000  |
| H                                | -5.919193000 | -0.754007000 | 1.118212000  | H                                                                       | -5.941076000 | -0.357135000 | 1.162764000  |
| C                                | -4.751008000 | -1.443304000 | -0.569849000 | C                                                                       | -4.874673000 | -1.341577000 | -0.453050000 |
| H                                | -5.246471000 | -0.796937000 | -1.302673000 | H                                                                       | -5.392599000 | -0.758754000 | -1.221810000 |
| H                                | -5.290517000 | -2.394790000 | -0.562679000 | H                                                                       | -5.397314000 | -2.294391000 | -0.342696000 |
| C                                | -3.308576000 | -1.657072000 | -0.943638000 | C                                                                       | -3.443110000 | -1.555949000 | -0.826027000 |
| H                                | -3.123444000 | 0.209660000  | -1.997572000 | H                                                                       | -3.212546000 | 0.388131000  | -1.745113000 |
| C                                | -2.622111000 | -2.795367000 | -0.505020000 | C                                                                       | -2.783315000 | -2.752787000 | -0.567265000 |
| H                                | -3.170351000 | -3.595850000 | -0.014109000 | H                                                                       | -3.342039000 | -3.605990000 | -0.193872000 |
| C                                | -1.245346000 | -2.909050000 | -0.693890000 | C                                                                       | -1.411421000 | -2.868818000 | -0.809714000 |
| C                                | -0.529907000 | -1.877703000 | -1.314695000 | C                                                                       | -0.660461000 | -1.788337000 | -1.305312000 |
| H                                | -0.724710000 | -3.807552000 | -0.373810000 | H                                                                       | -0.912957000 | -3.816248000 | -0.621387000 |
| H                                | 0.542494000  | -1.967193000 | -1.464230000 | H                                                                       | 0.401961000  | -1.900093000 | -1.501127000 |
| C                                | -1.208731000 | -0.755796000 | -1.780561000 | C                                                                       | -1.295896000 | -0.591401000 | -1.563098000 |
| H                                | -0.660100000 | 0.030186000  | -2.291434000 | H                                                                       | -0.731258000 | 0.248188000  | -1.960588000 |
| C                                | -2.106337000 | 1.867579000  | 0.383102000  | C                                                                       | -1.877537000 | 1.824563000  | 0.200176000  |
| C                                | -1.870484000 | -0.136602000 | 1.563327000  | C                                                                       | -1.794175000 | -0.171031000 | 1.462424000  |
| C                                | -2.553694000 | 3.012432000  | -0.329042000 | C                                                                       | -2.252788000 | 2.983030000  | -0.490305000 |
| H                                | -3.609073000 | 3.157996000  | -0.533502000 | H                                                                       | -3.264990000 | 3.110742000  | -0.861269000 |
| C                                | -1.614576000 | 3.918776000  | -0.745696000 | C                                                                       | -1.296938000 | 3.965165000  | -0.689333000 |
| H                                | -1.908933000 | 4.805249000  | -1.294936000 | H                                                                       | -1.555678000 | 4.874989000  | -1.218306000 |
| C                                | -0.241383000 | 3.702386000  | -0.465077000 | C                                                                       | 0.010158000  | 3.790955000  | -0.209231000 |
| C                                | 0.235246000  | 2.599401000  | 0.229924000  | C                                                                       | 0.406492000  | 2.644296000  | 0.475042000  |
| H                                | 0.479766000  | 4.434903000  | -0.814809000 | H                                                                       | 0.743541000  | 4.572672000  | -0.375869000 |
| H                                | 1.290603000  | 2.471700000  | 0.415751000  | H                                                                       | 1.418914000  | 2.527977000  | 0.834826000  |
| C                                | -0.716117000 | 1.671483000  | 0.650718000  | C                                                                       | -0.558835000 | 1.661986000  | 0.662189000  |
| N                                | -0.561213000 | 0.477386000  | 1.344806000  | N                                                                       | -0.457649000 | 0.414176000  | 1.318266000  |
| H                                | -2.110102000 | -0.196896000 | 2.634481000  | H                                                                       | -2.159824000 | -0.034402000 | 2.489999000  |
| H                                | -1.901798000 | -1.149335000 | 1.139115000  | H                                                                       | -1.784377000 | -1.239329000 | 1.233412000  |
| C                                | 0.615809000  | -0.168712000 | 1.593109000  | C                                                                       | 0.673745000  | -0.234968000 | 1.646268000  |
| C                                | 0.567475000  | -1.497257000 | 2.272605000  | C                                                                       | 0.570170000  | -1.559912000 | 2.335025000  |
| O                                | 1.675368000  | 0.372456000  | 1.243022000  | O                                                                       | 1.782620000  | 0.278979000  | 1.370382000  |
| H                                | -0.109598000 | -1.485546000 | 3.129476000  | H                                                                       | -0.140813000 | -1.524485000 | 3.163753000  |
| H                                | 1.574304000  | -1.764802000 | 2.588655000  | H                                                                       | 1.558518000  | -1.840349000 | 2.695150000  |
| H                                | 0.218474000  | -2.247362000 | 1.552390000  | H                                                                       | 0.241446000  | -2.318036000 | 1.614179000  |
| Fe                               | 3.071418000  | -0.205439000 | -0.107564000 | Fe                                                                      | 2.992468000  | -0.266099000 | -0.117679000 |

|                            |              |              |              |                            |              |              |              |
|----------------------------|--------------|--------------|--------------|----------------------------|--------------|--------------|--------------|
| Cl                         | 2.116014000  | 0.610570000  | -1.934842000 | Cl                         | 1.943402000  | 0.621957000  | -1.868377000 |
| Cl                         | 2.954226000  | -2.403853000 | 0.007066000  | Cl                         | 2.745760000  | -2.471902000 | -0.123693000 |
| Cl                         | 4.906624000  | 0.759867000  | 0.502861000  | Cl                         | 4.944926000  | 0.548324000  | 0.318506000  |
| <b>B1</b>                  |              |              |              | <b>A2</b>                  |              |              |              |
| E(RM062X) = -2369.49654770 |              |              |              | E(RM062X) = -3873.51738580 |              |              |              |
| C                          | -2.591900000 | -0.384873000 | -0.997208000 | C                          | -4.091004000 | 0.932047000  | 0.845694000  |
| C                          | -2.622224000 | 0.559885000  | 0.357377000  | C                          | -3.077550000 | -1.418770000 | -0.296922000 |
| C                          | -4.088238000 | 0.769871000  | 0.738453000  | C                          | -4.433274000 | -1.883772000 | -0.673789000 |
| C                          | -4.837103000 | -0.539600000 | 0.966122000  | H                          | -4.731451000 | -0.651408000 | -2.438258000 |
| C                          | -4.788811000 | -1.425713000 | -0.300650000 | H                          | -4.234733000 | -2.820252000 | -1.225416000 |
| C                          | -1.793145000 | -0.096620000 | 1.480980000  | H                          | -4.977459000 | -2.184677000 | 0.227537000  |
| C                          | -3.367050000 | -1.605414000 | -0.710533000 | C                          | -5.302044000 | -0.977173000 | -1.559871000 |
| C                          | -2.733619000 | -2.829530000 | -0.706259000 | H                          | -6.129223000 | -1.585695000 | -1.934206000 |
| C                          | -1.379873000 | -2.921667000 | -1.072046000 | C                          | -5.858743000 | 0.251515000  | -0.815709000 |
| C                          | -0.615923000 | -1.802061000 | -1.464733000 | H                          | -6.445920000 | -0.079533000 | 0.047483000  |
| C                          | -1.207388000 | -0.569903000 | -1.445495000 | H                          | -6.539088000 | 0.783886000  | -1.486277000 |
| C                          | -1.840268000 | 1.818119000  | 0.084247000  | C                          | -4.731096000 | 1.146107000  | -0.381298000 |
| N                          | -0.448322000 | 0.475899000  | 1.320668000  | H                          | -4.531174000 | 0.243083000  | 1.564086000  |
| C                          | -2.205072000 | 2.940766000  | -0.646150000 | C                          | -4.196610000 | 2.094029000  | -1.260880000 |
| C                          | -1.269658000 | 3.962863000  | -0.803693000 | H                          | -4.696335000 | 2.288567000  | -2.206575000 |
| C                          | 0.004941000  | 3.850581000  | -0.246570000 | C                          | -3.028693000 | 2.783876000  | -0.935978000 |
| C                          | -0.557902000 | 1.718436000  | 0.627176000  | C                          | -2.371897000 | 2.529836000  | 0.275113000  |
| C                          | 0.388509000  | 2.724171000  | 0.480914000  | H                          | -2.632300000 | 3.531461000  | -1.617225000 |
| C                          | 0.672402000  | -0.135738000 | 1.706658000  | H                          | -1.462071000 | 3.065980000  | 0.528733000  |
| O                          | 1.794220000  | 0.357656000  | 1.405466000  | C                          | -2.913965000 | 1.613727000  | 1.170911000  |
| C                          | 0.578330000  | -1.402330000 | 2.503597000  | H                          | -2.427719000 | 1.442141000  | 2.126541000  |
| Fe                         | 2.926670000  | -0.266607000 | -0.082056000 | C                          | -2.337683000 | -1.821281000 | 0.820952000  |
| Cl                         | 1.950263000  | 0.626701000  | -1.879535000 | C                          | -2.178291000 | -0.661992000 | -1.210758000 |
| Cl                         | 2.514449000  | -2.463929000 | -0.075027000 | C                          | -2.722730000 | -2.621755000 | 1.922439000  |
| Cl                         | 4.958868000  | 0.361128000  | 0.285653000  | H                          | -3.737236000 | -2.996581000 | 2.006994000  |
| H                          | -5.268417000 | -2.390591000 | -0.124799000 | C                          | -1.771514000 | -2.916167000 | 2.871572000  |
| H                          | -5.335265000 | -0.916896000 | -1.104198000 | H                          | -2.022440000 | -3.530950000 | 3.727913000  |
| H                          | -5.880303000 | -0.340919000 | 1.220730000  | C                          | -0.457135000 | -2.422105000 | 2.734254000  |
| H                          | -4.401715000 | -1.087822000 | 1.810240000  | C                          | -0.047917000 | -1.619103000 | 1.669669000  |
| H                          | -3.283133000 | -3.727977000 | -0.444497000 | H                          | 0.280057000  | -2.673472000 | 3.491025000  |
| H                          | -3.128830000 | 0.260096000  | -1.708159000 | H                          | 0.971935000  | -1.269133000 | 1.619081000  |
| H                          | -0.899981000 | -3.898293000 | -1.062529000 | C                          | -1.008630000 | -1.321185000 | 0.716047000  |
| H                          | 0.420402000  | -1.916718000 | -1.765530000 | N                          | -0.916172000 | -0.568064000 | -0.469095000 |
| H                          | -0.634194000 | 0.308821000  | -1.732915000 | H                          | -2.024199000 | -1.234979000 | -2.137488000 |
| H                          | 0.292420000  | -2.231756000 | 1.847888000  | H                          | -2.560784000 | 0.335075000  | -1.461683000 |
| H                          | -1.754008000 | -1.185946000 | 1.426081000  | C                          | 0.138483000  | 0.075729000  | -0.953279000 |
| H                          | 1.564553000  | -1.623080000 | 2.909140000  | C                          | 0.063867000  | 0.757698000  | -2.273453000 |
| H                          | -0.152198000 | -1.311951000 | 3.310566000  | O                          | 1.220292000  | 0.094741000  | -0.255582000 |
| H                          | 1.380549000  | 2.637323000  | 0.902780000  | H                          | -0.232719000 | 0.043292000  | -3.047256000 |
| H                          | 0.721410000  | 4.652934000  | -0.382349000 | H                          | 1.043578000  | 1.171373000  | -2.512326000 |
| H                          | -1.534270000 | 4.852015000  | -1.364539000 | H                          | -0.669643000 | 1.571624000  | -2.223818000 |
| H                          | -3.195665000 | 3.031336000  | -1.082696000 | Fe                         | 1.773425000  | 1.802944000  | 0.821057000  |

|                                                                               |              |              |              |                                         |              |              |              |
|-------------------------------------------------------------------------------|--------------|--------------|--------------|-----------------------------------------|--------------|--------------|--------------|
| H                                                                             | -4.583560000 | 1.349880000  | -0.049082000 | Cl                                      | 0.388309000  | 1.592109000  | 2.525521000  |
| H                                                                             | -4.108911000 | 1.386291000  | 1.643342000  | Cl                                      | 1.187675000  | 3.410643000  | -0.552555000 |
| H                                                                             | -2.204693000 | 0.198729000  | 2.453900000  | Cl                                      | 3.866121000  | 1.407646000  | 1.161997000  |
|                                                                               |              |              |              | Fe                                      | 2.728294000  | -1.267204000 | -0.887419000 |
|                                                                               |              |              |              | Cl                                      | 3.473002000  | -2.180214000 | 0.938457000  |
|                                                                               |              |              |              | Cl                                      | 1.228066000  | -2.559169000 | -1.942925000 |
|                                                                               |              |              |              | Cl                                      | 3.934688000  | -0.099728000 | -2.247164000 |
| <b>TS<sub>A2B2</sub></b><br>E(RM062X) = -3873.51429096<br>Frequency -168.6198 |              |              |              | <b>B2</b><br>E(RM062X) = -3873.52201529 |              |              |              |
| C                                                                             | -4.023152000 | 0.690742000  | 0.684305000  | C                                       | -3.857221000 | 0.332830000  | 0.454188000  |
| C                                                                             | -3.149842000 | -1.159762000 | -0.181095000 | C                                       | -3.178895000 | -1.044966000 | -0.126020000 |
| C                                                                             | -4.419755000 | -1.828266000 | -0.615751000 | C                                       | -4.311707000 | -1.935690000 | -0.641381000 |
| H                                                                             | -4.765539000 | -0.780980000 | -2.482761000 | H                                       | -4.546096000 | -1.042729000 | -2.604091000 |
| H                                                                             | -4.074829000 | -2.757597000 | -1.096218000 | H                                       | -3.861867000 | -2.855309000 | -1.030420000 |
| H                                                                             | -4.983667000 | -2.140155000 | 0.269258000  | H                                       | -4.947765000 | -2.228388000 | 0.202006000  |
| C                                                                             | -5.321184000 | -1.062623000 | -1.579930000 | C                                       | -5.153970000 | -1.256102000 | -1.716590000 |
| H                                                                             | -6.133270000 | -1.720184000 | -1.899003000 | H                                       | -5.962057000 | -1.915806000 | -2.039475000 |
| C                                                                             | -5.902012000 | 0.202994000  | -0.913954000 | C                                       | -5.765694000 | 0.062075000  | -1.185746000 |
| H                                                                             | -6.522883000 | -0.085788000 | -0.059874000 | H                                       | -6.479868000 | -0.181017000 | -0.388967000 |
| H                                                                             | -6.536139000 | 0.735589000  | -1.626500000 | H                                       | -6.306770000 | 0.589798000  | -1.973539000 |
| C                                                                             | -4.754170000 | 1.055286000  | -0.477413000 | C                                       | -4.681840000 | 0.915541000  | -0.622556000 |
| H                                                                             | -4.504147000 | 0.059739000  | 1.428238000  | H                                       | -4.499090000 | -0.066243000 | 1.254296000  |
| C                                                                             | -4.265445000 | 2.084223000  | -1.279494000 | C                                       | -4.353433000 | 2.152342000  | -1.136628000 |
| H                                                                             | -4.803098000 | 2.363291000  | -2.180952000 | H                                       | -4.918887000 | 2.568918000  | -1.964188000 |
| C                                                                             | -3.103118000 | 2.769087000  | -0.920364000 | C                                       | -3.302942000 | 2.891832000  | -0.569518000 |
| C                                                                             | -2.391889000 | 2.432877000  | 0.245795000  | C                                       | -2.551447000 | 2.434516000  | 0.536593000  |
| H                                                                             | -2.744849000 | 3.582674000  | -1.545430000 | H                                       | -3.060105000 | 3.864406000  | -0.992827000 |
| H                                                                             | -1.494334000 | 2.979466000  | 0.519538000  | H                                       | -1.763136000 | 3.047445000  | 0.959380000  |
| C                                                                             | -2.862332000 | 1.416946000  | 1.054118000  | C                                       | -2.827759000 | 1.198896000  | 1.044575000  |
| H                                                                             | -2.332095000 | 1.162112000  | 1.967465000  | H                                       | -2.254785000 | 0.816611000  | 1.886648000  |
| C                                                                             | -2.363619000 | -1.662219000 | 0.918193000  | C                                       | -2.323013000 | -1.656438000 | 0.952306000  |
| C                                                                             | -2.174245000 | -0.617338000 | -1.190003000 | C                                       | -2.139687000 | -0.721269000 | -1.217397000 |
| C                                                                             | -2.761473000 | -2.423428000 | 2.024640000  | C                                       | -2.712139000 | -2.376803000 | 2.072220000  |
| H                                                                             | -3.802599000 | -2.690798000 | 2.174928000  | H                                       | -3.757556000 | -2.604478000 | 2.259239000  |
| C                                                                             | -1.787966000 | -2.833858000 | 2.920386000  | C                                       | -1.725356000 | -2.818612000 | 2.953715000  |
| H                                                                             | -2.061143000 | -3.430886000 | 3.782684000  | H                                       | -2.005206000 | -3.393528000 | 3.829225000  |
| C                                                                             | -0.444757000 | -2.487745000 | 2.715917000  | C                                       | -0.381320000 | -2.531092000 | 2.716916000  |
| C                                                                             | -0.027156000 | -1.718967000 | 1.629094000  | C                                       | 0.023697000  | -1.796239000 | 1.603093000  |
| H                                                                             | 0.305092000  | -2.826641000 | 3.423058000  | H                                       | 0.375200000  | -2.883038000 | 3.409317000  |
| H                                                                             | 1.018057000  | -1.474474000 | 1.506980000  | H                                       | 1.071125000  | -1.580085000 | 1.446833000  |
| C                                                                             | -1.011340000 | -1.309711000 | 0.741684000  | C                                       | -0.973946000 | -1.369839000 | 0.736194000  |
| N                                                                             | -0.900445000 | -0.558154000 | -0.458596000 | N                                       | -0.854215000 | -0.648707000 | -0.497621000 |
| H                                                                             | -2.077957000 | -1.338877000 | -2.014565000 | H                                       | -2.089129000 | -1.545610000 | -1.938799000 |
| H                                                                             | -2.439087000 | 0.360815000  | -1.598659000 | H                                       | -2.322836000 | 0.213849000  | -1.749993000 |
| C                                                                             | 0.161114000  | 0.049301000  | -0.950049000 | C                                       | 0.209244000  | -0.091153000 | -1.022731000 |
| C                                                                             | 0.107351000  | 0.716232000  | -2.281464000 | C                                       | 0.214294000  | 0.393604000  | -2.434815000 |

|    |              |              |              |    |              |              |              |
|----|--------------|--------------|--------------|----|--------------|--------------|--------------|
| O  | 1.249538000  | 0.061553000  | -0.246721000 | O  | 1.282628000  | 0.025358000  | -0.287715000 |
| H  | -0.257893000 | 0.018476000  | -3.039784000 | H  | -0.070359000 | -0.422977000 | -3.104880000 |
| H  | 1.108966000  | 1.057394000  | -2.545625000 | H  | 1.219352000  | 0.737060000  | -2.684383000 |
| H  | -0.557684000 | 1.586733000  | -2.228451000 | H  | -0.477274000 | 1.232378000  | -2.556392000 |
| Fe | 1.724414000  | 1.732737000  | 0.878199000  | Fe | 1.520578000  | 1.767468000  | 0.752651000  |
| Cl | 0.291997000  | 1.514202000  | 2.550023000  | Cl | 0.255337000  | 1.502700000  | 2.551100000  |
| Cl | 1.121907000  | 3.358191000  | -0.483078000 | Cl | 0.521822000  | 3.192205000  | -0.642300000 |
| Cl | 3.812869000  | 1.433750000  | 1.305621000  | Cl | 3.639945000  | 1.965767000  | 1.038683000  |
| Fe | 2.784483000  | -1.210777000 | -0.943733000 | Fe | 2.924429000  | -1.151330000 | -0.818587000 |
| Cl | 3.593654000  | -2.152744000 | 0.838511000  | Cl | 3.761052000  | -1.709725000 | 1.110055000  |
| Cl | 1.331533000  | -2.511765000 | -2.042808000 | Cl | 1.642849000  | -2.706699000 | -1.772653000 |
| Cl | 3.948307000  | 0.081963000  | -2.234987000 | Cl | 4.035712000  | 0.065555000  | -2.231830000 |



#### IV. NMR spectra of new compounds

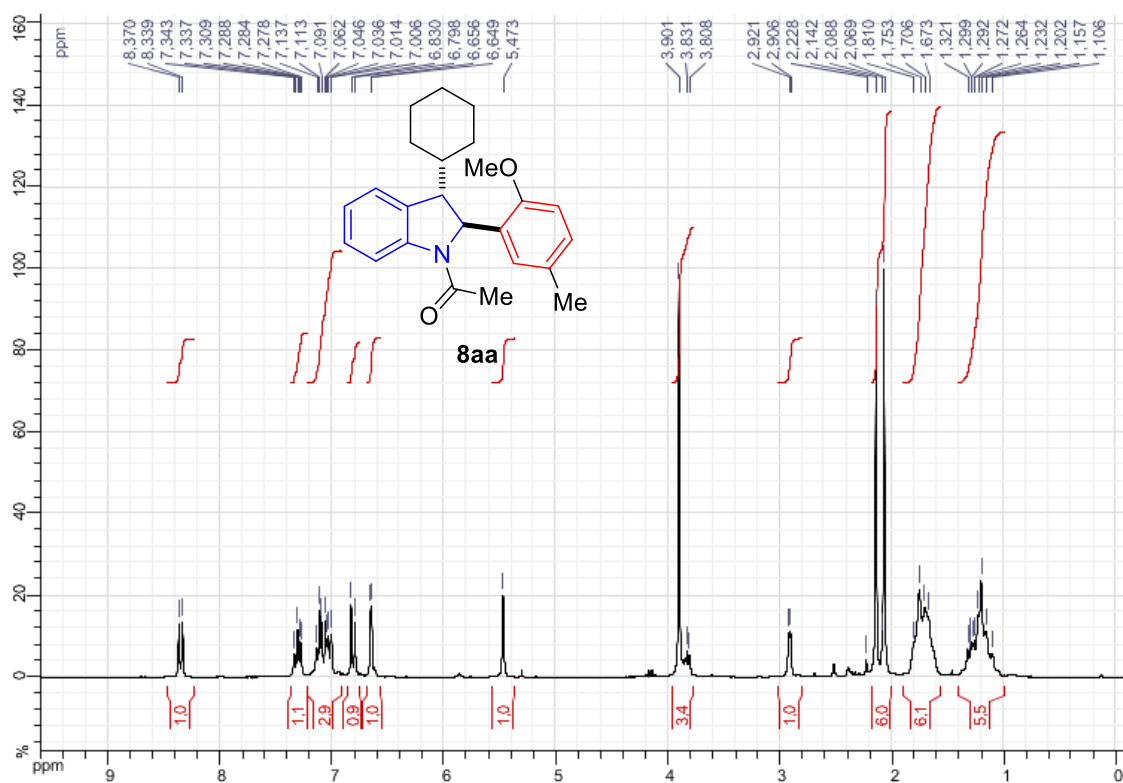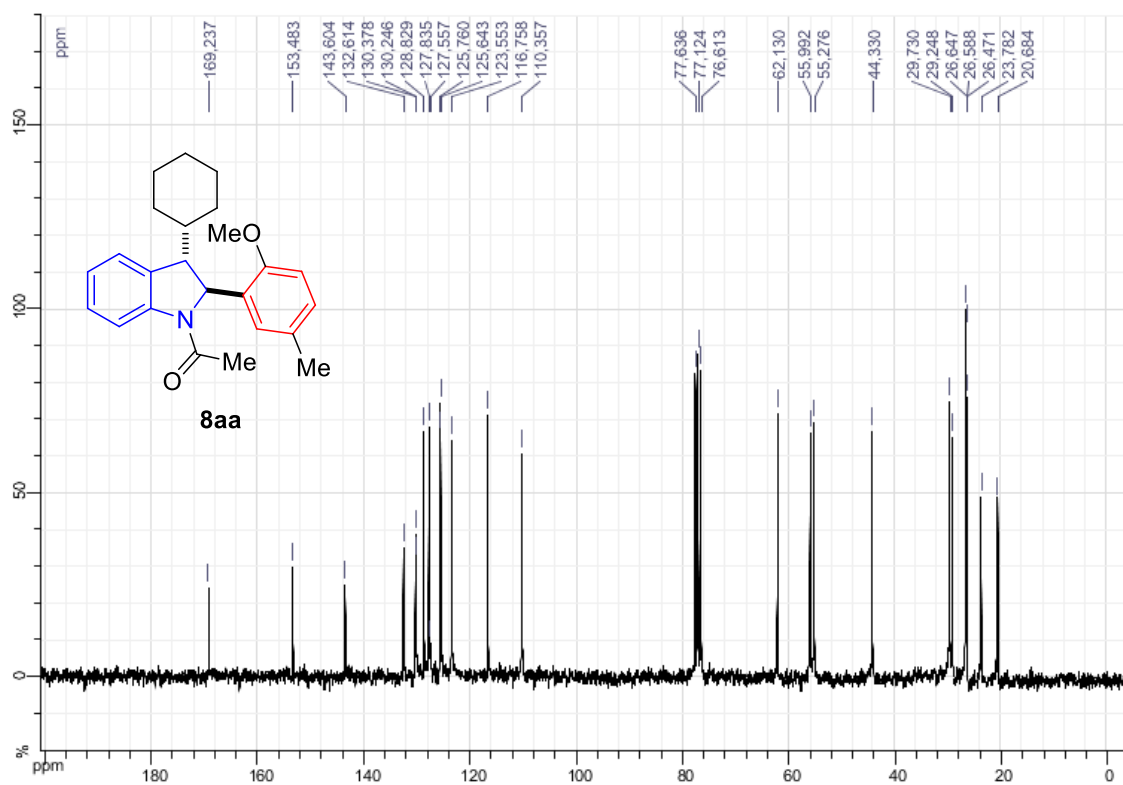

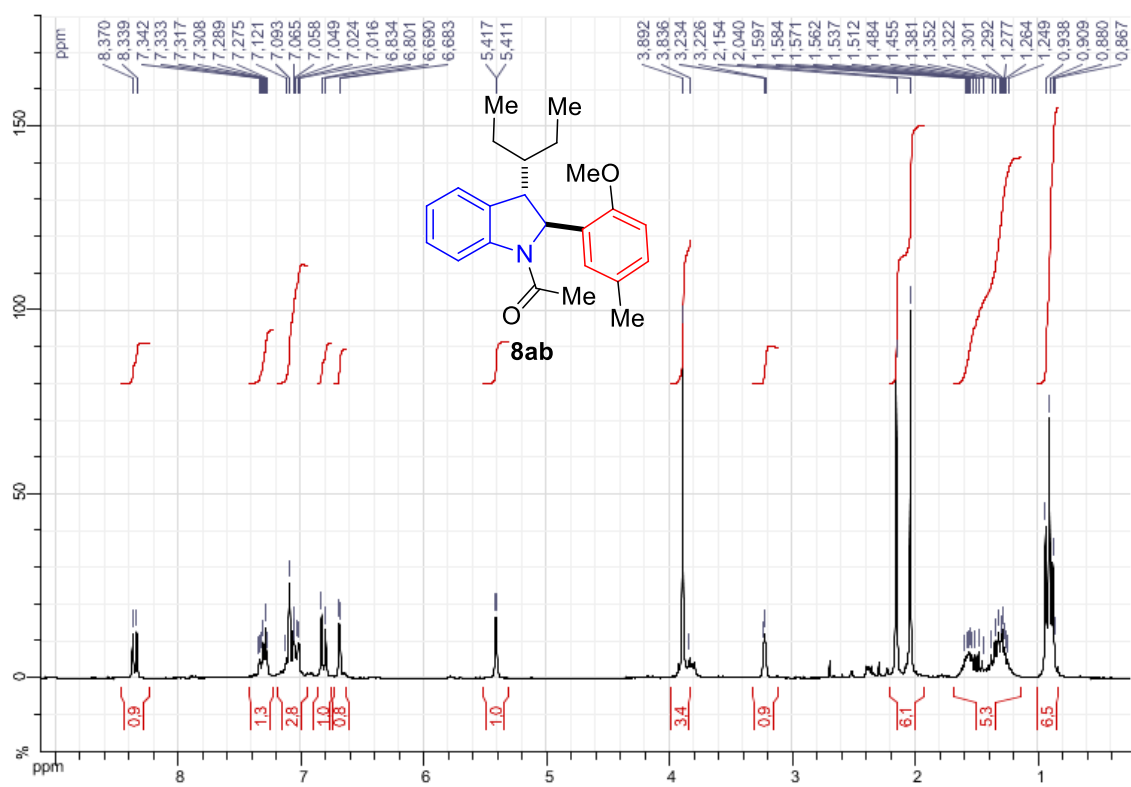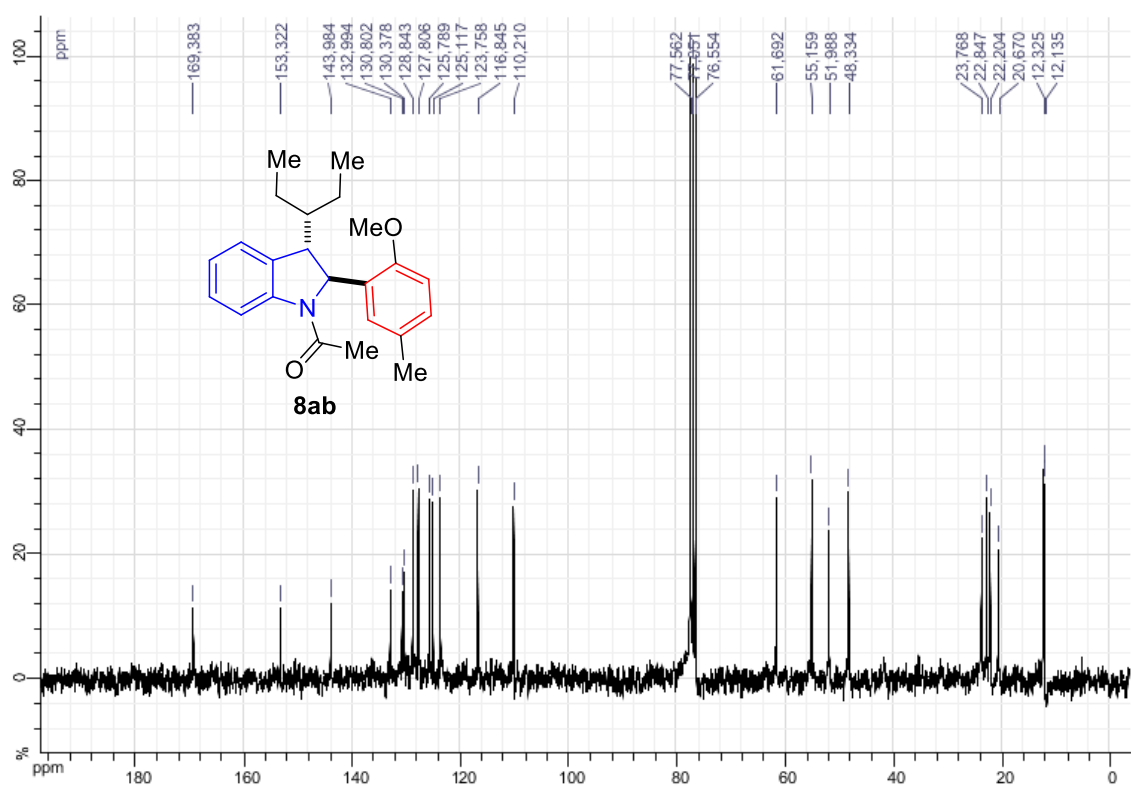

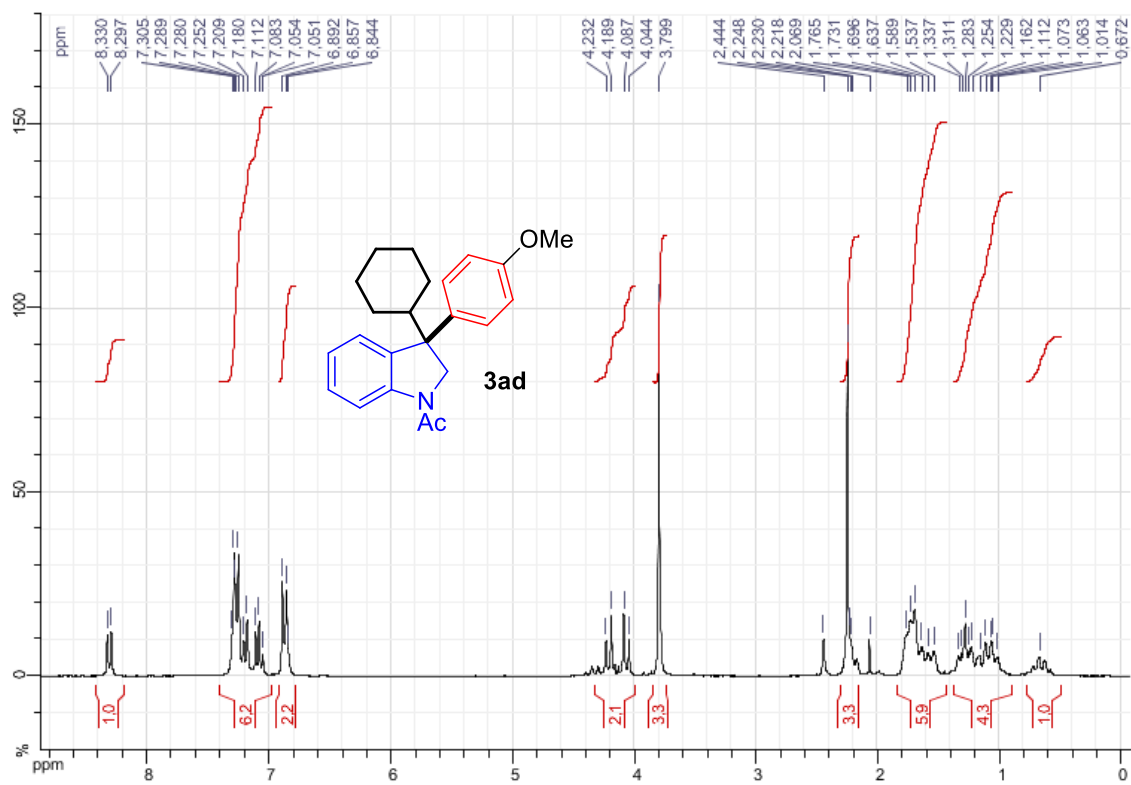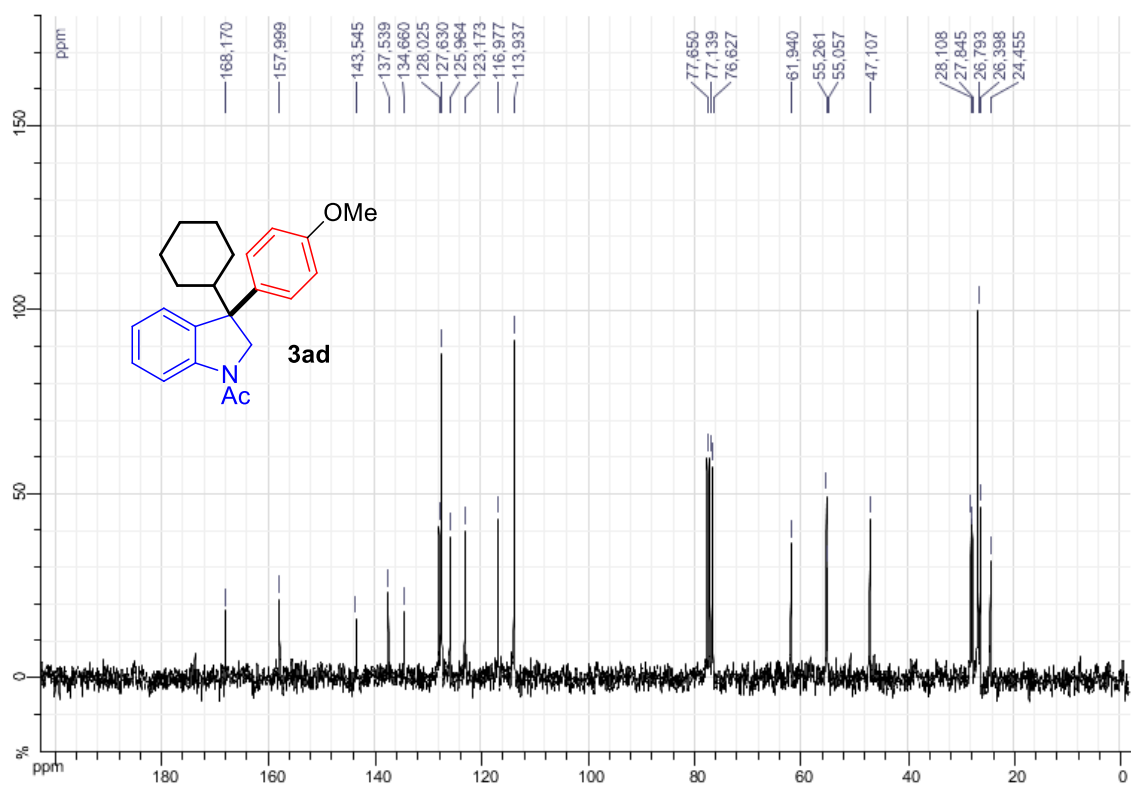

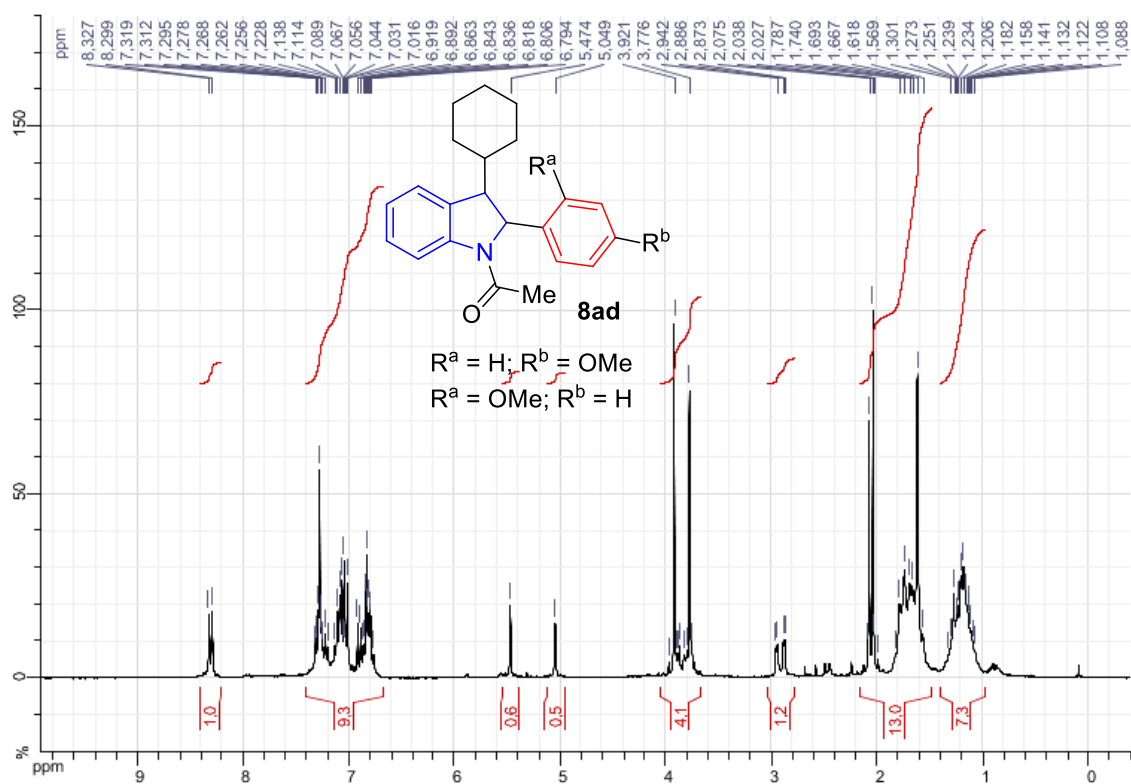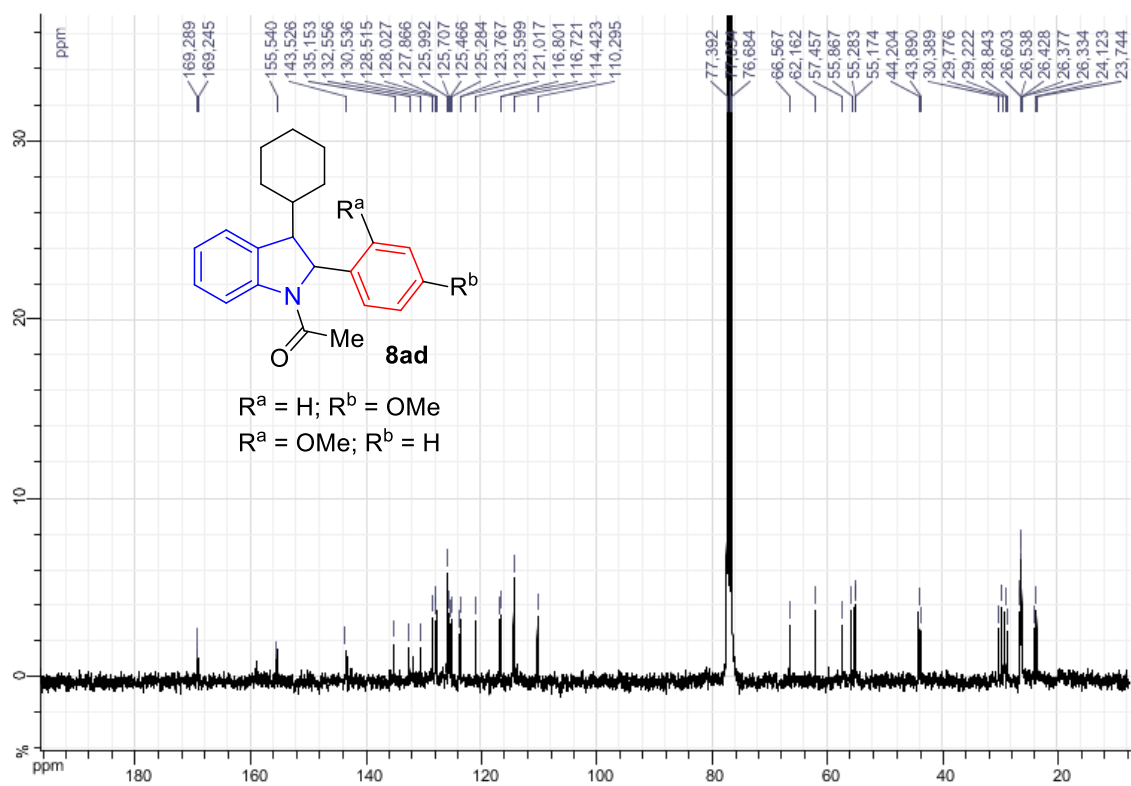

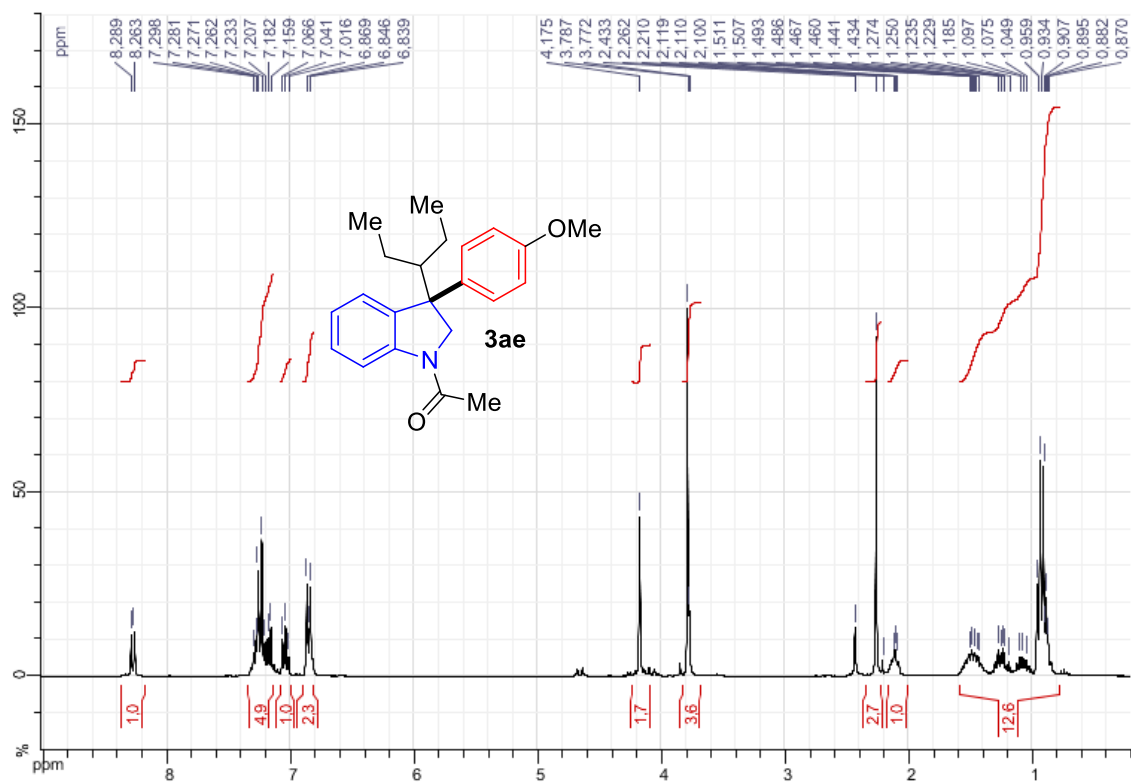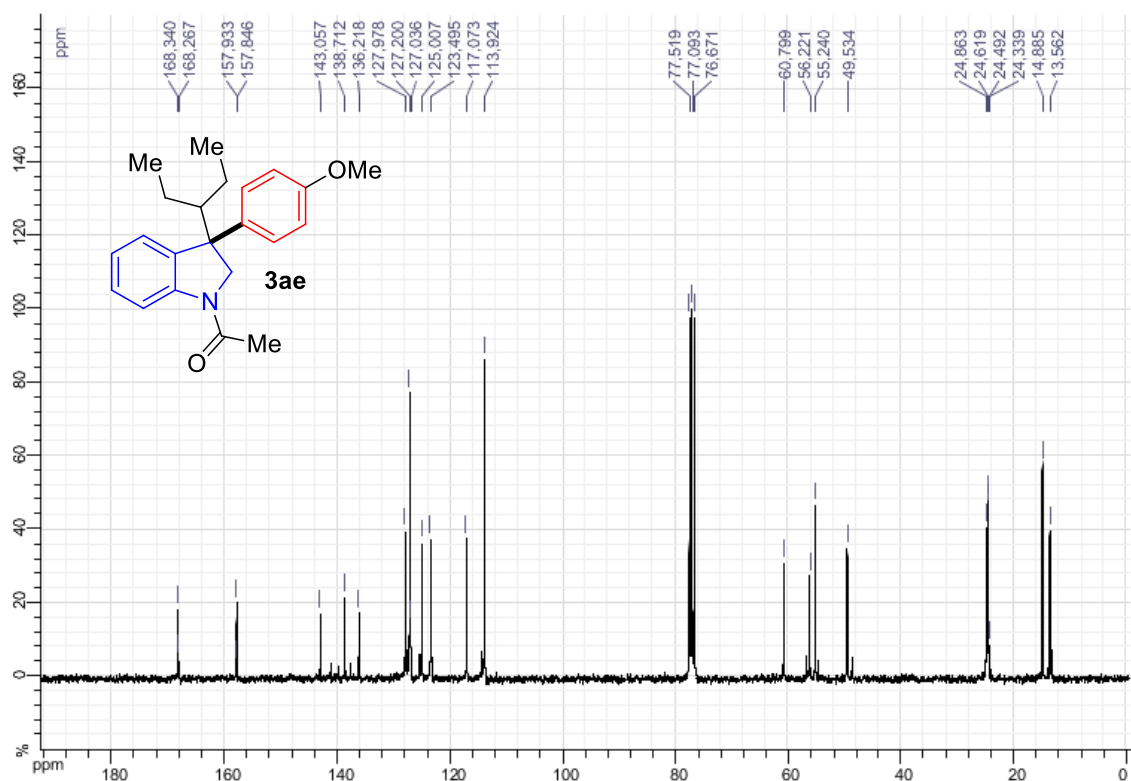

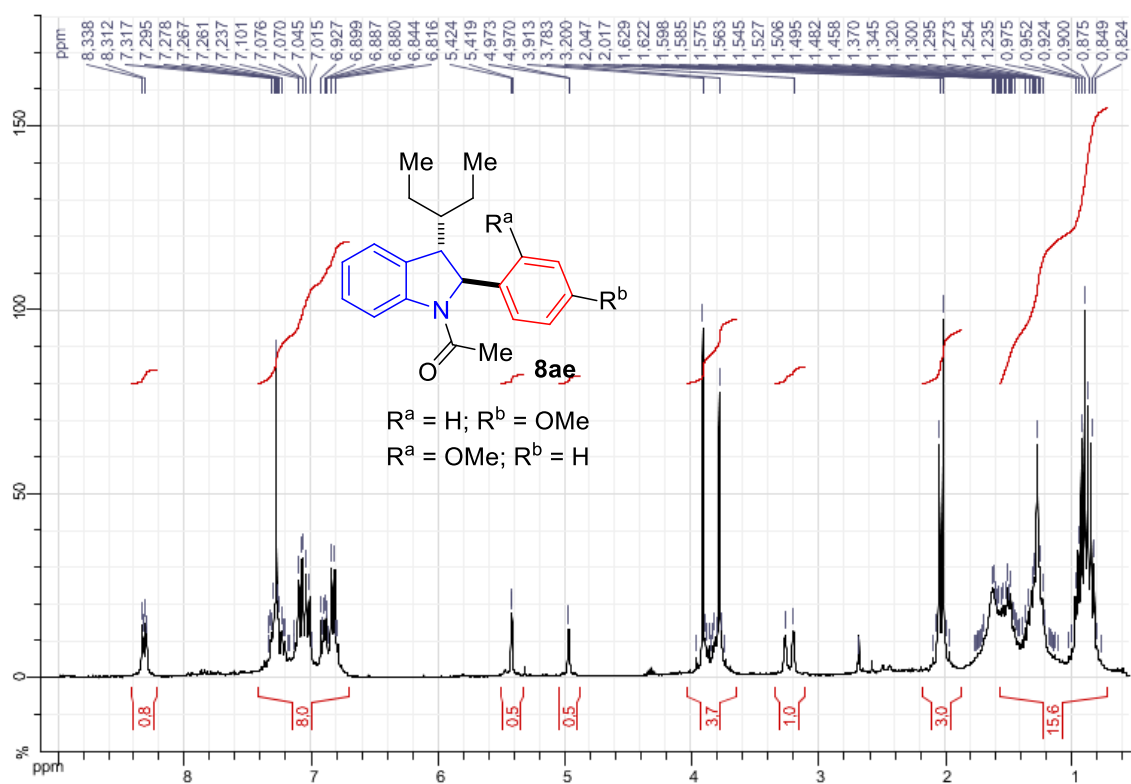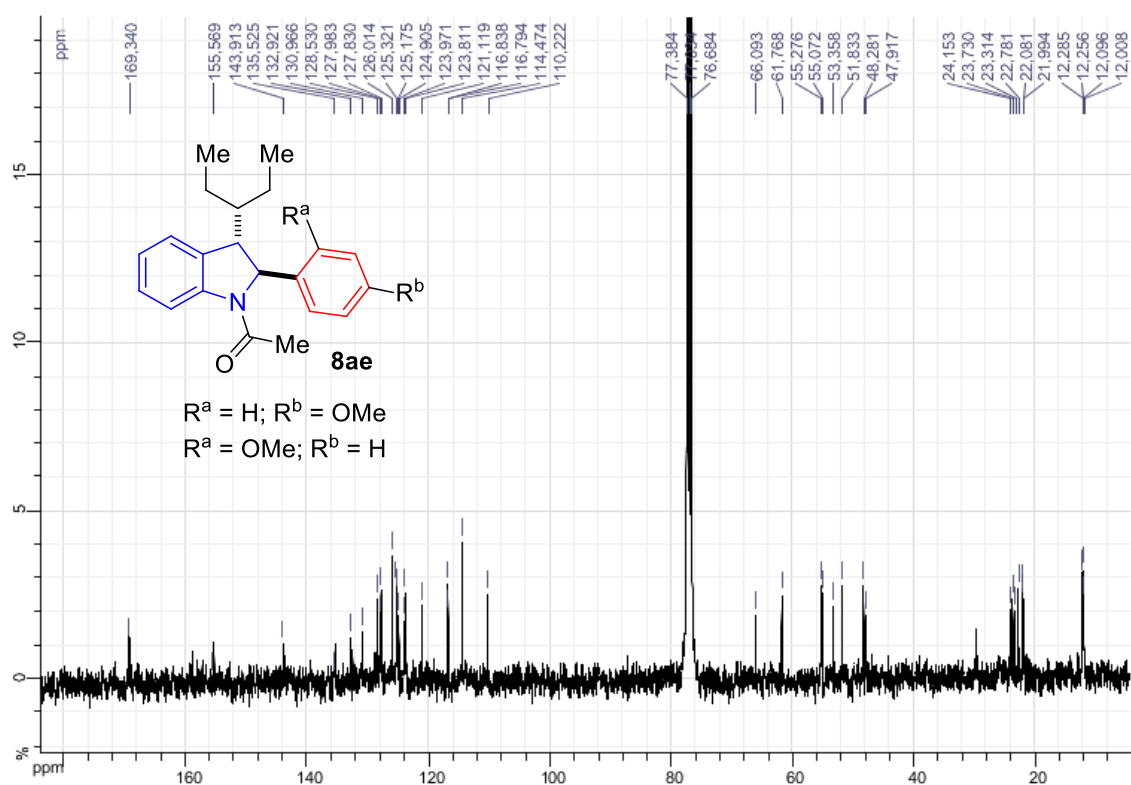

Supplement: c7cc02756g1.pdf [file c7cc02756g1.pdf]
